# 1 Model-driven design and evolution of non- 2 trivial synthetic syntrophic pairs

3  
4 Colton J. Lloyd<sup>1</sup>, Zachary A. King<sup>1</sup>, Troy E. Sandberg<sup>1</sup>, Ying Hefner<sup>1</sup>, Connor A. Olson<sup>1</sup>, Patrick  
5 V. Phaneuf<sup>3</sup>, Edward J. O'Brien<sup>3</sup>, Adam M. Feist<sup>1,2\*</sup>

6 <sup>1</sup>Department of Bioengineering, University of California, San Diego, 9500 Gilman Drive, La Jolla, CA  
7 92093, USA

8 <sup>2</sup>Novo Nordisk Foundation Center for Biosustainability, Technical University of Denmark, 2800 Lyngby,  
9 Denmark

10 <sup>3</sup>Bioinformatics and Systems Biology Program, University of California, San Diego, 9500 Gilman Drive, La  
11 Jolla, CA 92093, USA

12 \* Corresponding author

13 E-mail: [afeist@ucsd.edu](mailto:afeist@ucsd.edu)

## 14 Abstract

15 Synthetic microbial communities are attractive for applied biotechnology and healthcare  
16 applications through their ability to efficiently partition complex metabolic functions. By pairing  
17 auxotrophic mutants in co-culture, nascent *E. coli* communities can be established where strain  
18 pairs are metabolically coupled. Intuitive synthetic communities have been demonstrated, but  
19 the full space of cross-feeding metabolites has yet to be explored. A novel algorithm, OptAux,  
20 was constructed to design 66 multi-knockout *E. coli* auxotrophic strains that require significant  
21 metabolite cross-feeding when paired in co-culture. Three OptAux predicted auxotrophic strains

22 were co-cultured with an L-histidine auxotroph and validated via adaptive laboratory evolution  
23 (ALE). Time-course sequencing revealed the genetic changes employed by each strain to  
24 achieve higher community fitness and provided insights on mechanisms for sharing and  
25 adapting to the syntrophic niche. A community model of metabolism and gene expression was  
26 utilized to predict the relative community composition and fundamental characteristics of the  
27 evolved communities. This work presents a novel computational method to elucidate metabolic  
28 changes that empower community formation and thus guide the optimization of co-cultures for a  
29 desired application.

30

## 31 Author Summary

32 Understanding the fundamental characteristics of microbial communities has far reaching  
33 implications for human health and applied biotechnology. Currently, many basic characteristics  
34 underlying the establishment of cooperative growth in bacterial communities have not been  
35 studied in detail. The presented work sought to elucidate the properties of nascent community  
36 formation by first employing a novel computational method to generate a comprehensive  
37 catalog of *E. coli* mutants that require a high amount of metabolic cooperation to grow in  
38 community. Three mutants from this catalog were co-cultured with a proven auxotrophic partner  
39 *in vivo* and evolved via adaptive laboratory evolution. In order to successfully grow, each strain  
40 in co-culture had to evolve under a pressure to secrete a metabolite required by the partner  
41 strain, as well as evolve to effectively utilize the required metabolite produced by its partner. The  
42 genomes of the successfully growing communities were sequenced, thus providing new insights  
43 into the genetic changes accompanying the formation and optimization of the new communities.  
44 A computational model was further developed to predict how fundamental protein constraints on

45 cell metabolism could impact the structure of the community, such as the relative abundances of  
46 each community member.

47

## 48 Introduction

49 Microbial communities are capable of accomplishing many intricate biological feats, due to their  
50 ability to partition metabolic functions among community members. For this reason, studying  
51 their characteristics has far reaching implications. For example, these microbial consortia have  
52 the attractive potential to efficiently accomplish complex tasks that a single engineered microbial  
53 strain likely could not. Past applications include applying communities to aid in waste  
54 decomposition, fuel cell development, and the creation of biosensors [1]. In the field of  
55 metabolic engineering, microbial communities have now been engineered that are capable of  
56 enhancing product yield or improving process stability by partitioning catalytic functions among  
57 community members [2–8]. Beyond biotechnology applications, studying microbial communities  
58 also has important health implications. This includes providing a better understanding of the gut  
59 microbiome and how it is affected by diet and other factors [9,10]. For example, metabolic  
60 cross-feeding in communities has been shown to have a role in modulating the efficacy of  
61 antibiotics treatments [11]. Developing new computational and experimental methods to  
62 understand the dynamics of microbial community formation and the inherent characteristics of  
63 established communities could therefore have far reaching implications.

64

65 Previous efforts have been made to construct synthetic communities and study their interactions  
66 and new metabolic capabilities. One such study encouraged synthetic symbiosis between *E.*  
67 *coli* strains by co-culturing an L-isoleucine auxotroph with a L-leucine auxotroph [12,13]. In  
68 doing so, it was found that the community was able to grow in glucose minimal media without

69 amino acid supplementation due to amino acid cross-feeding between the mutant pairs. Mee *et*  
70 *al.* expanded upon this work by studying all possible binary pairs of 14 amino acid auxotrophs  
71 and developing methods to predict the results of combining the auxotrophic strains into 3-  
72 member, 13-member, and 14-member communities [14]. On a larger scale, Wintermute *et al.*  
73 co-cultured 46 conditionally lethal Keio collection *E. coli* single knockouts [15]. This effectively  
74 demonstrated that synthetic mutualism was possible in strains beyond amino acid auxotrophs  
75 [16]. These studies effectively demonstrate that new communities can be established in a  
76 relatively short time (<4 days) by pairing auxotrophic strains.

77  
78 In addition to demonstrating that synthetic communities can be established, nascent auxotrophic  
79 communities can be optimized by adaptive laboratory evolution (ALE) [17]. Expanding upon the  
80 experimental work done in Mee *et al.* [14], Zhang *et al.* performed ALE on one of the co-culture  
81 pairs: a L-lysine auxotroph paired with a L-leucine auxotroph [17]. Separate co-cultures evolved  
82 to growth rates 3-fold greater than the parent, which was accomplished by forming different  
83 auxotroph strain abundances within the community. These results may have implications on  
84 both the set of metabolites being cross-fed as well as the magnitude of metabolite  
85 secretion/uptake. The increase in the evolved community growth rate is encouraging from a  
86 metabolic engineering point of view because it suggests that these binary systems can be  
87 optimized via ALE. Presumably, as an effect of an evolution, the rate of secretion/uptake of the  
88 cross-fed metabolite must increase as well to achieve higher community growth. Co-culture  
89 pairs composed of different microbial species have also been evolved with similar results [18].  
90 Community optimization by ALE, however, has not been performed on co-cultures designed to  
91 require higher fluxes of metabolic cross-feeding than the direct biomass requirement of a  
92 particular amino acid, and the genetic mechanisms that lead to improved community fitness  
93 have not been assessed.

94

95 Established computational methods to study microbial communities often make use of genome-  
96 scale metabolic models (M-models) [19,20]. Computational models have been created and  
97 simulated using multicompartmental flux balance analysis (FBA) [21–23], dynamic flux balance  
98 analysis (dFBA) [17,24], dFBA integrated with spatial diffusion of extracellular metabolites  
99 (COMETS) [25], and FBA with game theory [26]. Novel algorithms have also been developed to  
100 describe community dynamics, such as OptCom [27], which employs a bilevel linear  
101 programming problem by maximizing community biomass as well as maximizing the inner  
102 biomass objectives of each individual species [28]. Additional ecological models have been  
103 formulated to describe community dynamics [29–31]. Despite the advances made by these  
104 approaches, the role of efficient proteome allocations in driving community dynamics has not  
105 been studied in detail.

106  
107 Here, we demonstrate that nascent *E. coli* communities can be constructed from co-cultures of  
108 auxotroph mutants requiring high fluxes of metabolic cross-feeding. We first introduce the  
109 OptAux algorithm for designing auxotrophic strains that require high amounts of supplemented  
110 metabolites in order to grow (**Figure 1A**). The OptAux solutions provided a catalog of starting  
111 strains from which four auxotrophic mutants were selected to co-culture and optimized via  
112 adaptive laboratory evolution (**Figure 1B**). In optimizing the growth of the nascent co-culture  
113 communities, significant metabolic rewiring had to occur to allow the strains to cross-feed the  
114 high levels of the necessary metabolites. The genetic changes accompanying this rewiring was  
115 assessed by analyzing the genetic changes (mutations and observed genome region  
116 duplications). This analysis thus enabled predictions of primary metabolite cross-feeding and  
117 community composition.

118

119

120 To study the characteristics of designed and optimized communities, a community model of  
121 metabolism and expression (ME-model) was constructed [32–34] (**Figure 1C**). Such a modeling  
122 approach was necessary since previous methods of genome-scale community modeling have  
123 focused on studying the metabolic flux throughout community members (using M-models)  
124 without consideration of the enzymatic cost of proteins and pathways that drive these metabolic  
125 processes. As proteome optimization via niche partitioning and cell specialization is a driving  
126 factor of community formation in ecological systems [35–38], it is essential to consider  
127 proteomic constraints when studying bacterial communities. To this end, community ME-models  
128 were successfully utilized to interpret the nascent communities and were used to suggest  
129 approaches to optimize the evolved co-cultures and potentially modulate metabolic cross-  
130 feeding.

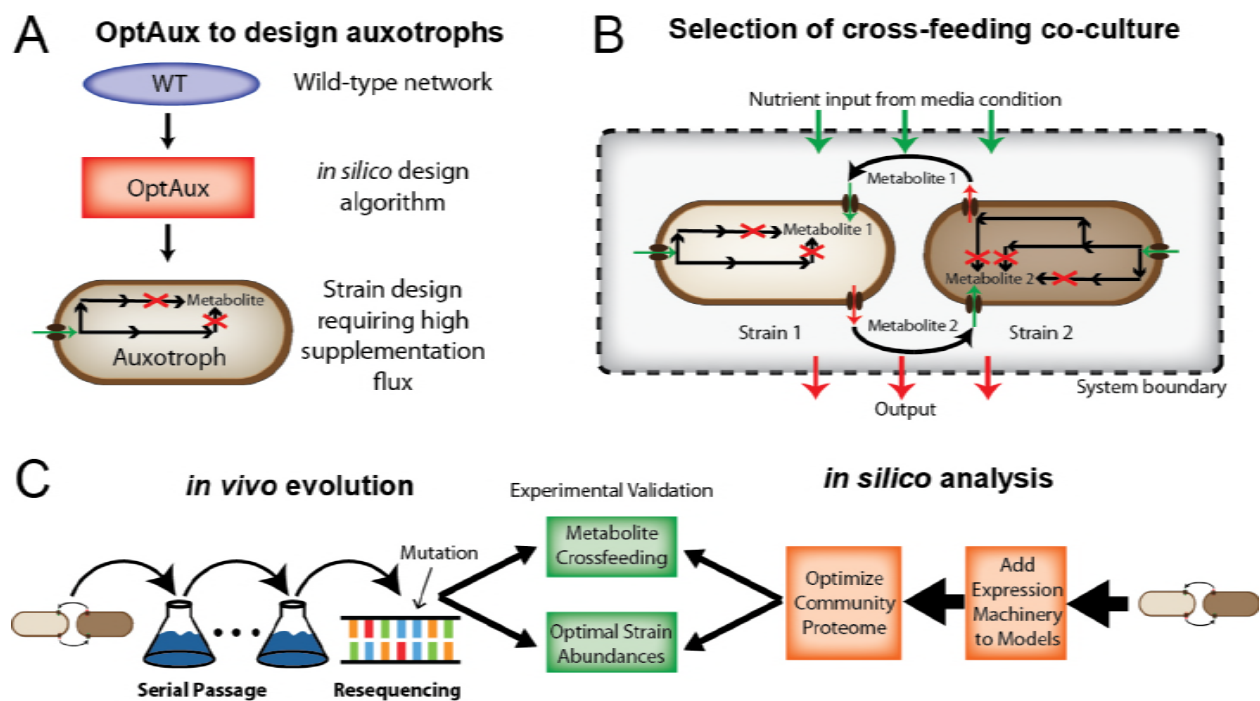

131  
132  
133 **Figure 1. Study Overview** **A:** An algorithm was developed to *de novo* predict reaction deletions that will produce *E.*  
134 *coli* strains auxotrophic for a metabolite of interest. **B:** From the set of auxotrophic strain designs, pairs were selected  
135 to determine whether they were capable of forming a nascent syntrophic cross-feeding community. **C:** The chosen

136 co-cultures were both evolved via adaptive laboratory evolution and modeled using a genome-scale model of *E. coli*  
137 metabolism and expression (ME-model) [19,20]. The model predictions of optimal strain abundances and metabolite  
138 cross-feeding were verified using resequencing data from the co-culture wet-lab experiments.  
139

## 140 Results

### 141 OptAux Development and Simulation

142 The OptAux algorithm identifies strain designs that are predicted to be auxotrophic for a  
143 metabolite of interest. The algorithm was built by modifying an existing concept introduced for  
144 the design of metabolite producing strains [39] which was later additionally implemented in a  
145 mixed-integer linear programming (MILP) algorithm (RobustKnock [40]). Three key  
146 modifications were made to derive OptAux from RobustKnock. **First**, the inner growth rate  
147 optimization was replaced so that OptAux can be run at a predetermined minimum growth rate  
148 bound (*set\_biomass* constraint **Figure 2B**). This ensures that OptAux designs are auxotrophic  
149 at all growth rates (**Figure 2A**). **Second**, the objective coefficient was reversed in order to allow  
150 the algorithm to optimize for metabolite uptake as opposed to secretion. **Third**, a constraint was  
151 added to allow the model to uptake any additional metabolite that can be consumed by the  
152 model (*trace\_metabolite\_threshold* constraint **Figure 2B**). For simulations in which this  
153 threshold value was set above zero, all possible exchange metabolites included in the model  
154 had their lower bound set to the *trace\_metabolite\_threshold* value to compete with a target  
155 metabolite uptake, allowing the “specificity” of the knockout solution to be adjusted. Specificity,  
156 in this case, refers to whether the mutant strain will be auxotrophic for a given metabolite in the  
157 presence of other metabolites. High specificity solutions are auxotrophic for only one metabolite,  
158 regardless of whether other metabolites are present. With this implementation, OptAux identified

159 strain designs that require the targeted metabolite at all growth rates with varying metabolite  
 160 specificity and uptake requirements.

161

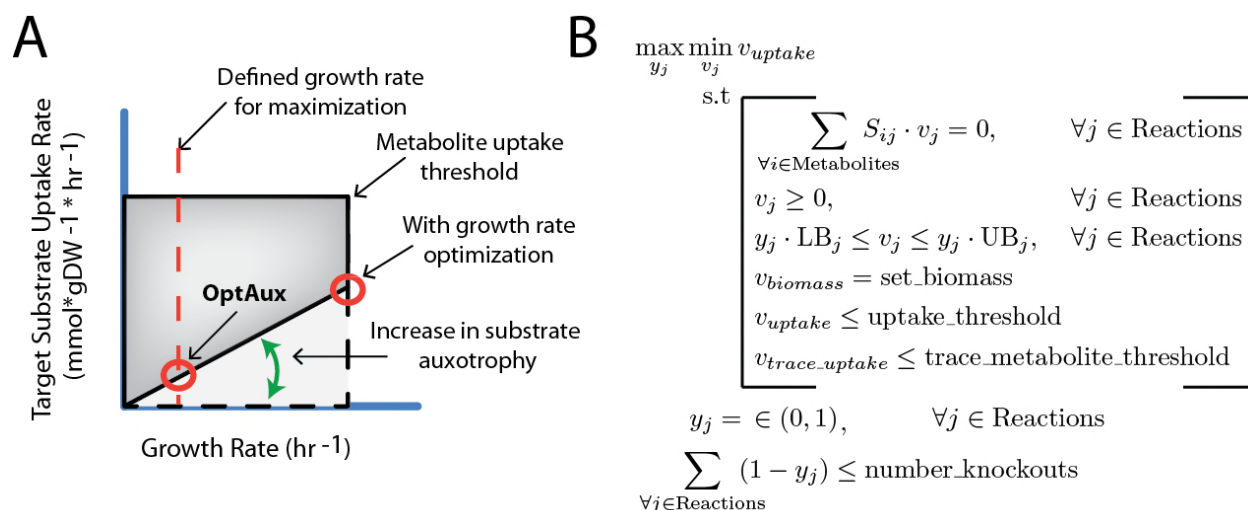

162

163 **Figure 2. OptAux Design A:** OptAux was developed to maximize the minimum uptake of a target metabolite. Unlike  
 164 algorithms such as OptKnock with tilting [21] and RobustKnock [22], this optimization occurs at a predetermined  
 165 growth rate as opposed to using an inner optimization of growth rate (depicted with the red circles). This is to ensure  
 166 that all OptAux designs will be auxotrophic for the target metabolite at all growth rates, particularly low growth rates.  
 167 The dotted lines show the required uptake for the metabolite with no genetic interventions. In this case, uptake of the  
 168 target metabolite is not required at any growth rate. The solid black lines depict the maximum and minimum uptake  
 169 required for a particular metabolite of an OptAux designed strain. **B:** The OptAux optimization problem. For further  
 170 description of the algorithm and underlying logic see **Methods**.

171

172

173 OptAux was utilized on the *iJO1366* M-model of *E. coli* K-12 MG1655 [41] to comprehensively  
 174 examine auxotrophic strain designs. OptAux was run with 1, 2, and 3 reaction knockouts for 285  
 175 metabolite uptake reactions using 4 different trace metabolite thresholds (**S1 Data**). Of the given  
 176 solutions, 228 knockout sets were found to be capable of producing 66 unique strain  
 177 auxotrophies. This set of strain designs presents an expansive look into the auxotrophies



178 possible in the *E. coli* K-12 MG1655 metabolic network, which could be used to understand the  
179 possible niches of *E. coli* could inhabit in natural or synthetic communities [42].

## 180 OptAux Solution Characteristics

181 The OptAux strain designs were broken into two major categories based on the number of  
182 metabolites which, when supplemented, restore cell growth: **1) Essential Biomass**  
183 **Component Elimination Designs (EBC, Figure 3B)** and **2) Major Subsystem Elimination**  
184 **Designs (MSE, Figure 3A)**. The EBC designs are characterized as auxotrophic strains with  
185 high metabolite specificity. They were broken into two subcategories: specific auxotrophs (only  
186 one metabolite can restore growth, **Figure S2**) which consists of 104 (23 unique) knockout sets,  
187 and nonspecific auxotrophs (defined as strains in which less than 5 metabolites can restore  
188 growth, **Figure S2**) which consists of 55 (20 unique) knockout sets. The specific and nonspecific  
189 EBC designs were preferred at high trace metabolite threshold values. There is significant  
190 overlap between OptAux predicted EBC designs, and known *E. coli* auxotrophic mutants  
191 [14,43–54]. A summary of experimentally characterized OptAux designs are presented in **Table**  
192 **S1**. Of note, there are five designs that were not found to be previously characterized in the  
193 scientific literature, and these present novel *E. coli* auxotrophs.

194  
195 MSE designs were analyzed as novel auxotrophic strain designs. These were defined as strains  
196 in which five or more metabolites could restore growth and consisted of the remaining 69 (23  
197 unique) sets of knockouts. At low trace metabolite thresholds, MSE designs were the preferred  
198 OptAux solution. This knockout strategy was often accomplished through knockouts to block  
199 metabolic entry points into anabolic subsystems. One such example of an MSE design is given  
200 in **Figure 3B**. Here a three reaction knockout design of the FUM, PPC, and MALS reactions can  
201 be rescued by one of the four compounds in the figure (citrate, L-malate, 2-oxoglutarate, or L-  
202 asparagine) at an average required uptake flux of  $0.4 \text{ mmol gDW}^{-1} \text{ hr}^{-1}$  to grow at a rate of 0.1

203  $\text{hr}^{-1}$ . These rates are higher than the fluxes needed to rescue the EBC design in **Figure 3A**,  
 204 which requires uptake of  $0.024 \text{ mmol gDW}^{-1} \text{ hr}^{-1}$  on average to grow at a rate of  $0.1 \text{ hr}^{-1}$ . Another  
 205 design was a glutamate synthase (GLUSy) and glutamate dehydrogenase (GLUDy) double  
 206 knockout which effectively blocks the entry of nitrogen into amino acid biosynthesis by  
 207 preventing its incorporation into 2-oxoglutarate to produce L-glutamate. This renders the cell  
 208 unable to produce all amino acids, nucleotides, and several cofactors. In order to grow at a rate  
 209 of  $0.1 \text{ hr}^{-1}$ , this strain is computationally predicted to require one of 19 individual metabolites at  
 210 an average uptake of  $0.62 \text{ mmol/gDW/hr}$  (**Supplemental Data File 2**).

211

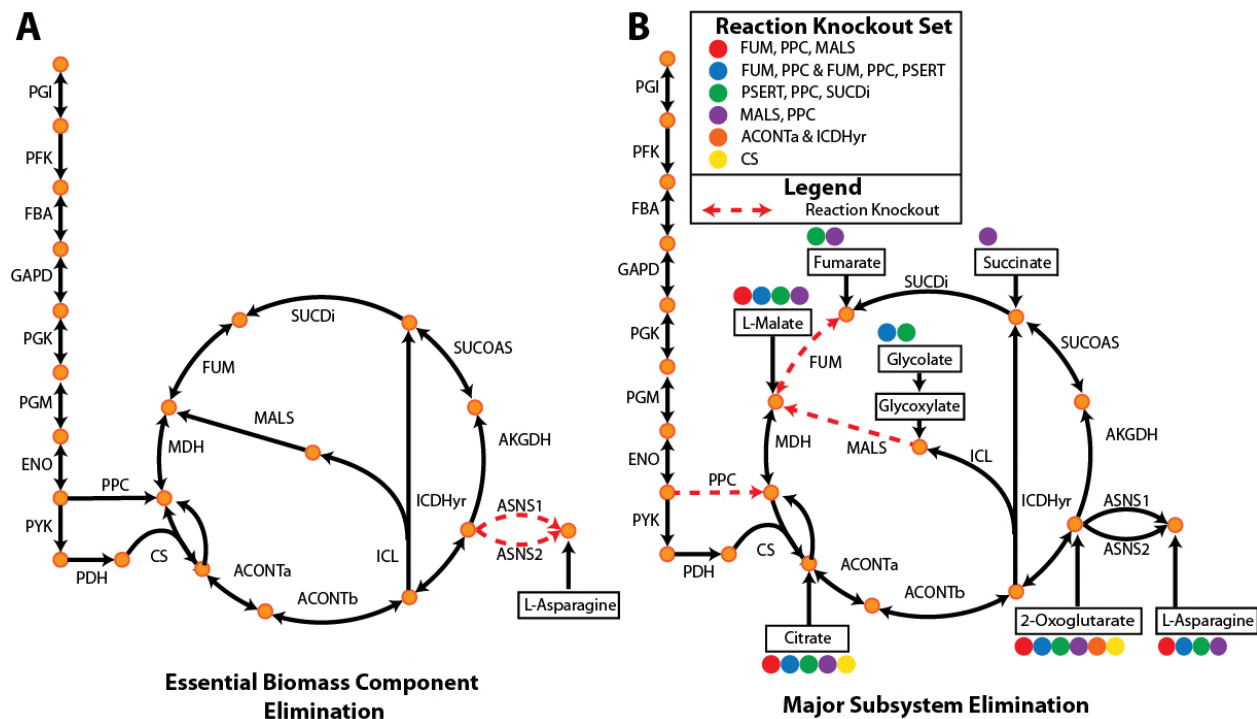

212

213

214 **Figure 3. OptAux Solutions** Depending on the parameters used when running OptAux, two major solution types  
 215 are possible. **A: Essential Biomass Component Elimination** designs, like the ASNS1 and ASNS2 knockout shown,  
 216 can grow only when one specific metabolite is supplemented. For the case shown, this metabolite is L-asparagine. **B:**  
 217 Alternatively, **Major Subsystem Elimination** designs have a set of alternative metabolites that can restore growth in  
 218 these strains. Examples of these designs are shown for citric acid cycle knockouts sets. One specific three reaction  
 219 knockout design (FUM, PPC, MALS) is shown in red dashed lines where four metabolites in the figure can

220 individually rescue this auxotroph (marked with solid red circles). The metabolites that can restore growth for each of  
221 the knockout strain designs listed in the legend are indicated with the colored circle associated with the reaction  
222 knockouts.

223  
224 MSE designs are of particular interest as they are largely unique, nontrivial, and have often not  
225 been studied as *E. coli* auxotrophies. However, some of the MSE single knockouts have been  
226 used for large-scale studies of auxotrophic co-culture short term growth [16]. Since these  
227 predicted MSE knockouts disrupt significant biological processes, they produce auxotrophies  
228 that require much larger amounts of metabolite supplementation in order to grow, compared to  
229 EBC designs (e.g., **Figure S3**). This makes MSE *E. coli* mutants attractive from a microbial  
230 community perspective because they would require a pronounced rewiring of the metabolic flux  
231 of their partner strains in co-culture to secrete the high amount of the auxotrophic metabolite  
232 needed for community growth.

## 233 Adaptive Laboratory Evolution of Auxotrophic *E. coli* Co-cultures

234 To demonstrate how the OptAux algorithm can be leveraged to design strains and co-culture  
235 communities, *E. coli* auxotrophic mutants were validated in the wet lab and evolved in co-  
236 culture. Three communities were tested, each consisting of pairwise combinations of four  
237 OptAux predicted auxotrophs. This included one EBC design,  $\Delta hisD$ , which was validated as an  
238 L-histidine auxotroph, paired with each of three MSE designs,  $\Delta pyrC$ ,  $\Delta gltA\Delta prpC$ , and  
239  $\Delta gdhA\Delta gltB$ . These three MSE strains had disruptions in pyrimidine synthesis, TCA cycle  
240 activity, and nitrogen assimilation into amino acids, respectively (**Table S2**). The  $\Delta pyrC$  mutant  
241 was computationally predicted to be able to grow when supplemented with one of 20  
242 metabolites in *iJO1366*, and the  $\Delta gltA\Delta prpC$  and  $\Delta gdhA\Delta gltB$  mutants were predicted to grow in  
243 the presence of 14 and 19 metabolites, respectively (**S2 Data, Table S4**).

244

245 Upon inoculation into the first flask of batch growth, each of the co-culture's growth rates were  
 246 low ( $<0.05 \text{ hr}^{-1}$ ) suggesting the strains initially showed minimal cooperativity or metabolic cross-  
 247 feeding (**Figure S4**). Following approximately 40 days of ALE, all three co-culture combinations  
 248 had evolved to establish a nascent community, indicated by an increase in the co-culture growth  
 249 rate. There was diversity in the endpoint batch growth rates among the independently evolved  
 250 triplicates for each of the  $\Delta hisD$  &  $\Delta pyrC$  and the  $\Delta hisD$  &  $\Delta gdhA\Delta gltB$  co-cultures with endpoint  
 251 growth rates ranging from  $0.09\text{--}0.15 \text{ hr}^{-1}$  and  $0.08\text{--}0.15 \text{ hr}^{-1}$ , respectively. The four successfully  
 252 evolved independent replicates for the  $\Delta hisD$  &  $\Delta gltA\Delta prpC$  co-cultures also showed endpoint  
 253 growth rate diversity ranging from  $0.12\text{--}0.19 \text{ hr}^{-1}$  (**Table 1, Figure 4A**). The relatively large  
 254 range in endpoint growth rates for all co-cultures suggests that a subset of replicates evolved to  
 255 a less optimal state and could be further improved if given more time to evolve.

256

257 **Table 1.** Final growth rates and fractional strain abundance of the  $\Delta hisD$  strain, by characteristic mutation, for each  
 258 ALE lineage.

| Combo                                                                             | ALE # | Final growth rate (hr-1) | Relative Abundance of $\Delta hisD$ (by Characteristic Mutation) |
|-----------------------------------------------------------------------------------|-------|--------------------------|------------------------------------------------------------------|
| <b><math>\Delta hisD</math><br/>&amp;<br/><math>\Delta pyrC</math></b>            | 2     | $0.09 \pm 0.02$          | $0.29 \pm 0.06$                                                  |
|                                                                                   | 3     | $0.15 \pm 0.01$          | $0.21 \pm 0.12$                                                  |
|                                                                                   | 4     | $0.10 \pm 0.02$          | $0.19 \pm 0.11$                                                  |
| <b><math>\Delta hisD</math><br/>&amp;<br/><math>\Delta gdhA\Delta gltB</math></b> | 5     | $0.15 \pm 0.01$          | $0.54 \pm 0.09$                                                  |
|                                                                                   | 6     | $0.08 \pm 0.01$          | $0.59 \pm 0.05$                                                  |
|                                                                                   | 8     | $0.10 \pm 0.02$          | $0.58 \pm 0.08$                                                  |
| <b><math>\Delta hisD</math><br/>&amp;<br/><math>\Delta gltA\Delta prpC</math></b> | 9     | $0.19 \pm 0.01$          | $0.60 \pm 0.11$                                                  |
|                                                                                   | 10    | $0.12 \pm 0.02$          | $0.48 \pm 0.05$                                                  |
|                                                                                   | 11    | $0.13 \pm 0.01$          | $0.56 \pm 0.09$                                                  |
|                                                                                   | 12    | $0.19 \pm 0.01$          | $0.59 \pm 0.05$                                                  |

259

260 To probe the metabolic strategies of the three co-culture pairs, the genomes of the populations  
261 were resequenced at several time points over the course of the 40 day evolution (**Figure 4A**).  
262 The resequencing data was used to identify gene region duplications and acquired mutations  
263 (**Figure 4B**) that provided insight into the specific mechanisms employed by the co-cultures to  
264 establish cooperation.

265

266 The relative strain abundance of each mutant was also tracked to understand the dynamics of  
267 community composition in the synthetic co-culture. Each starting strain contained unique  
268 characteristic mutations (**Table S3**) which could act as a barcode to track the community  
269 composition (**Figure 4B, Table 1**). The breseq mutation identification software [55] was used to  
270 calculate the frequency of each of these characteristic mutations within a sequenced co-culture.  
271 The relative frequency of the characteristic mutations was used to approximate the fraction of  
272 each strain within the co-culture population. This analysis showed that 2 of the 3 co-culture  
273 combinations maintained similar relative fractions of the two member strains, whereas one co-  
274 culture,  $\Delta hisD$  &  $\Delta pyrC$ , consistently maintained a relative  $\Delta pyrC$  abundance of near three  
275 quarters of the total population (71-81%, **Table 1**). Alternatively, the relative abundance of each  
276 strain in the populations was predicted by comparing the read coverage of the deleted genes  
277 relative to the mean, which showed good agreement with the characteristic mutation-based  
278 predictions (**Figures S4-5**).

279

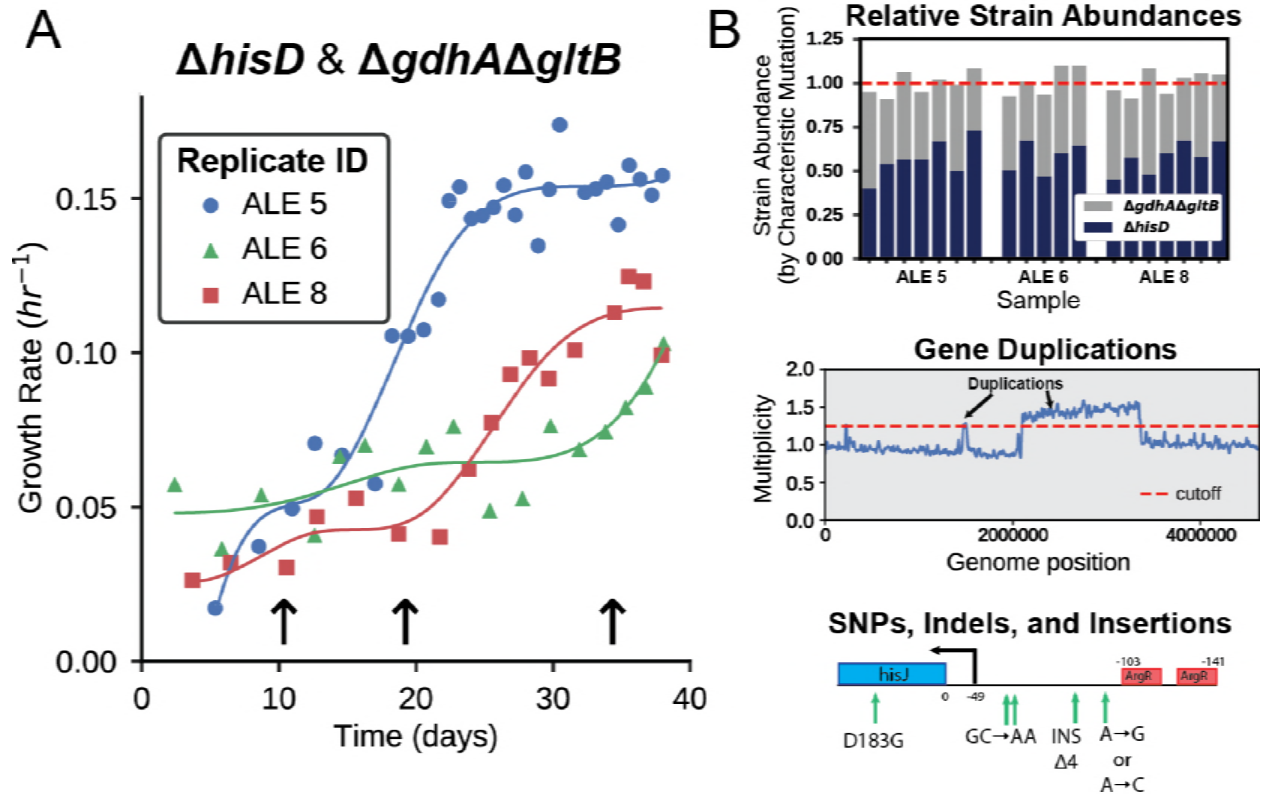

280  
 281 **Figure 4. Adaptive Laboratory Evolution** **A:** *E. coli* co-cultures were evolved over a 40 day period and the growth  
 282 rate was periodically measured. Three of the co-cultures evolved were capable of establishing syntrophy and showed  
 283 an improvement in growth rate. The arrows indicate the time points at which samples were taken during the *ΔhisD* &  
 284 *ΔgdhAΔgltB* co-culture ALE. **B:** Each of the sampled co-cultures were sequenced. This information was used to  
 285 predict the fractional strain abundances of each of the co-culture members. It was also used to identify duplications in  
 286 genome regions of one of the community members and infer causal mutations that improved community fitness.  
 287

## 288 Mutations Likely Affecting Metabolite Uptake/Secretion

289 Several evolutionary strategies were observed in the mutations identified across the ten  
 290 successfully evolved co-culture lineages (**Tables S5-7**). One ubiquitous strategy across all three  
 291 co-culture pairs was to acquire mutations within or upstream of inner membrane transporter  
 292 genes. For instance, numerous mutations were observed in every co-culture lineage in the *hisJ*  
 293 ORF or in the 5'UTR of the *hisJ* operon. This operon contains all four genes (*hisJ*, *hisM*, *hisP*,

294 *hisQ*) composing the histidine ABC uptake complex, the primary mechanism for histidine uptake  
295 in *E. coli* K-12 MG1655 [56]. Seven mutations were found in the region directly upstream of the  
296 transcription start site (**Figure 5**). Three of the five substitutions were observed in more than  
297 one co-culture pairing with a SNP in one position (A->G, A->C or A->T at 86 base pairs  
298 upstream of *hisJ*) appearing to be particularly beneficial as it was identified in every lineage  
299 except one (ALE #5). In three ALEs, a mutation was observed within the *hisJ* ORF that resulted  
300 in a substitution of aspartate residue at the 183 position by glycine. Based on the protein  
301 structure, this substitution could disrupt two hydrogen bond interactions with bound L-histidine  
302 ligand in the periplasm [57]. Further mutations were observed that could affect the binding of the  
303 ArgR repressor to the 5' UTR of the *hisJMPQ* operon or affect the activity of the ArgR protein  
304 itself (**Table S5**). This included a 121 base pair deletion and a SNP in the binding site of the  
305 ArgR repressor in the 5' UTR of *hisJ* (**Figure 5**). The mutation in the *argR* ORF consisted of a  
306 frameshift insertion early in the coding sequence and persisted throughout ALE #8, appearing in  
307 the  $\Delta hisD$  endpoint clone (**Table S6**). ArgR functions to repress L-arginine uptake and  
308 biosynthesis as well as the L-histidine ABC uptake complex [58] in response to elevated L-  
309 arginine concentrations. All of these mutations could improve L-histidine uptake in the  $\Delta hisD$   
310 strains either by directly increasing the efficacy of the HisJMPQ ABC uptake system or by  
311 preventing ArgR mediated repression of this transporter.

312

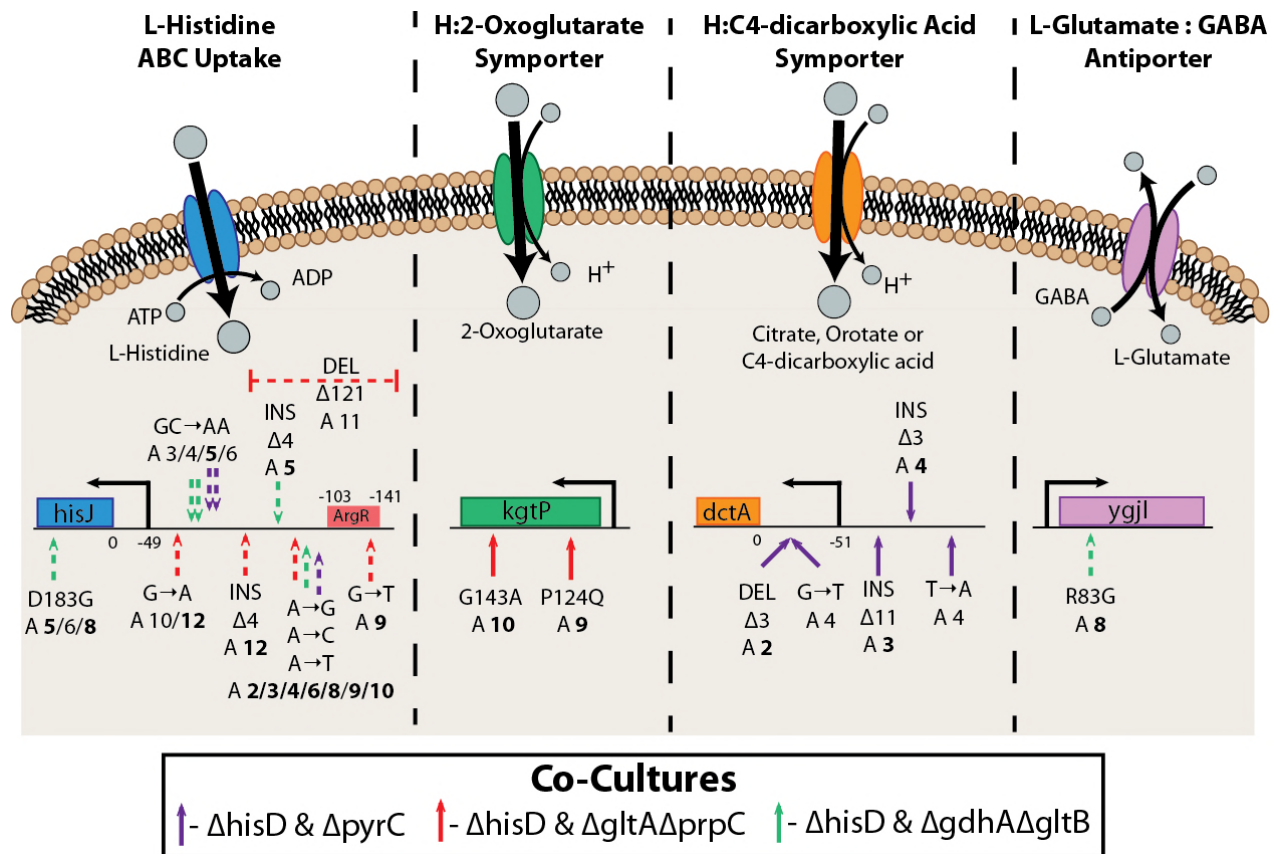

313

314

315 **Figure 5. Mutations Affecting Inner Membrane Metabolite Transport** Mutations were observed affecting the  
 316 activity of four inner membrane transporters. A schematic of the function or putative function of each transporter is  
 317 shown. Depicted below the schematics are the relative locations of the observed mutations on the operon encoding  
 318 each of the enzymatic complexes. For example, all ten evolved  $\Delta hisD$  strain endpoints possessed at least one  
 319 mutation in or upstream of *hisJ*. This operon includes genes coding for HisJMPQ, the four subunits of a histidine ABC  
 320 uptake system. A depiction of the activity of this complex is shown, in which energy from ATP hydrolysis is used to  
 321 transport histidine into the cytosol from the periplasm. Mutations are indicated on the operon schematics if mutations  
 322 appear at >10% frequency in more than one flask, and ALE numbers are in bold if the mutation appears in the  
 323 endpoint clone strain. The mutations indicated with a dashed arrow occurred in the  $\Delta hisD$  strain and a solid arrow  
 324 indicates they occurred in its partner MSE strain.

325

326

327 Beyond improving the uptake of L-histidine in the  $\Delta hisD$  strain, mutations were observed that  
 328 could improve metabolite uptake in a partnering strain. For instance, in the  $\Delta hisD$  &  $\Delta gltA\Delta prpC$



329 co-culture, two of the  $\Delta gltA\Delta prpC$  strains acquired mutations in the *kgtP* ORF (a transporter of  
330 2-oxoglutarate [59]) that were present in the endpoint clones. These mutations include a  
331 substitution of a L-proline residue with a L-glutamine at the 124 position and a substitution of a  
332 glycine residue with an L-alanine at the 143 position. These two substitutions occurred in the  
333 fourth transmembrane helix in the protein and a cytoplasmic region [60], respectively, and could  
334 act to augment or complement the mutation in the 5' UTR of the *kgtP* ORF seen in the starting  
335 clone of the  $\Delta gltA\Delta prpC$  mutant (**Table S5**). Both the accumulation of mutations associated with  
336 this transporter and the fact that the citrate synthase knockout mutant is computationally  
337 predicted to grow in the presence of 2-oxoglutarate suggest that  $\Delta gltA\Delta prpC$  could be cross-fed  
338 2-oxoglutarate when in co-culture.

339  
340 A recurrent mutation was observed in the  $\Delta hisD$  &  $\Delta pyrC$  co-culture that could function to better  
341 facilitate uptake of a metabolite being cross-fed from the  $\Delta hisD$  strain to the  $\Delta pyrC$  strain. The  
342 three independently evolved lineages each acquired at least one mutation in the 5' UTR of *dctA*,  
343 which were confirmed to be in all  $\Delta pyrC$  endpoint clones (**Table S7**). The gene product of *dctA*  
344 functions as a proton symporter that can uptake orotate, malate, citrate, and C4-dicarboxylic  
345 acids [61] (**Figure 5**). Further, simulations of a  $\Delta pyrC$  strain predict that growth is possible with  
346 orotate supplementation, but not with any of the other metabolites known to be transported by  
347 the *dctA* gene product. Thus, it was proposed that these mutations could act to increase the  
348 activity of this transporter to allow the  $\Delta pyrC$  strain to more efficiently uptake orotate cross-fed  
349 by the  $\Delta hisD$  strain.

350  
351 Lastly, one lineage of the  $\Delta hisD$  &  $\Delta gdhA\Delta gltB$  co-culture acquired a SNP in the *ygjI* coding  
352 region; the SNP was present in the  $\Delta hisD$  endpoint clone and resulted in a substitution of L-  
353 arginine for glycine at position 83 of this protein. This position is within a periplasmic region and  
354 one residue prior to a transmembrane helix of the protein [62]. The function of this protein has

355 not been experimentally confirmed, but based on sequence similarity, it is predicted to be a  
356 GABA:glutamate antiporter [63]. Given that this mutation was seen in the *ΔhisD* clone, it is  
357 possible that this mutation had the effect of increasing the strain's secretion of 4-aminobutyrate  
358 (GABA) or L-glutamate. Such a mutation could improve community fitness by facilitating the  
359 cross-feeding of either these metabolites to the *ΔgdhAΔgltB* strain since it is predicted to be  
360 auxotrophic for both metabolites (**Table S4**).

### 361 Mutations Likely Affecting Nitrogen Regulation

362 Removing reactions in major biosynthetic pathways likely results in a disruption of the  
363 homeostatic concentrations of key sensor metabolites or an activation of nutrient limitation  
364 stress responses. Mutations were observed in the evolved co-cultured sets which point to  
365 mechanisms to adapt to these pathway disruptions. Examples of this adaptation included three  
366 frameshift mutations early in the *glnK* ORF found in three *ΔgltAΔprpC* clones from the *ΔhisD* &  
367 *ΔgltAΔprpC* co-cultures (**Figure 6A**) and one premature stop codon in the *ΔhisD* clone of the  
368 same co-culture. The frameshift mutations would possibly affect the AmtB nitrogen uptake  
369 system as well, as it is located on the operon downstream of GlnK. GlnK is one of two nitrogen  
370 regulators with overlapping functions that are uridylylated depending on the relative  
371 concentrations of 2-oxoglutarate and L-glutamate. In conditions of high relative 2-oxoglutarate  
372 concentration relative to L-glutamate, GlnK is uridylylated and the *E. coli* nitrogen limitation  
373 response is triggered [64]. Unlike the alternative nitrogen regulator, GlnB, however, when not  
374 uridylylated GlnK binds to the AmtB nitrogen uptake complex, reducing its activity [65]. The citrate  
375 synthase knockout (*ΔgltAΔprpC*) in particular could see a disruption in the homeostatic  
376 concentrations of metabolites immediately downstream of the reaction, including 2-oxoglutarate  
377 and L-glutamate. This could impair the ability of the cell to respond to sensors of nitrogen  
378 excess or limitation and respond with the proper global regulatory changes. Removing the  
379 activity of this GlnK mediated response system would prevent any detrimental cellular

380 responses given that the strains are both grown in excess ammonium. No mutations, however,  
 381 were observed in the alternative nitrogen regulator, GlnB, throughout any of the evolutions.  
 382

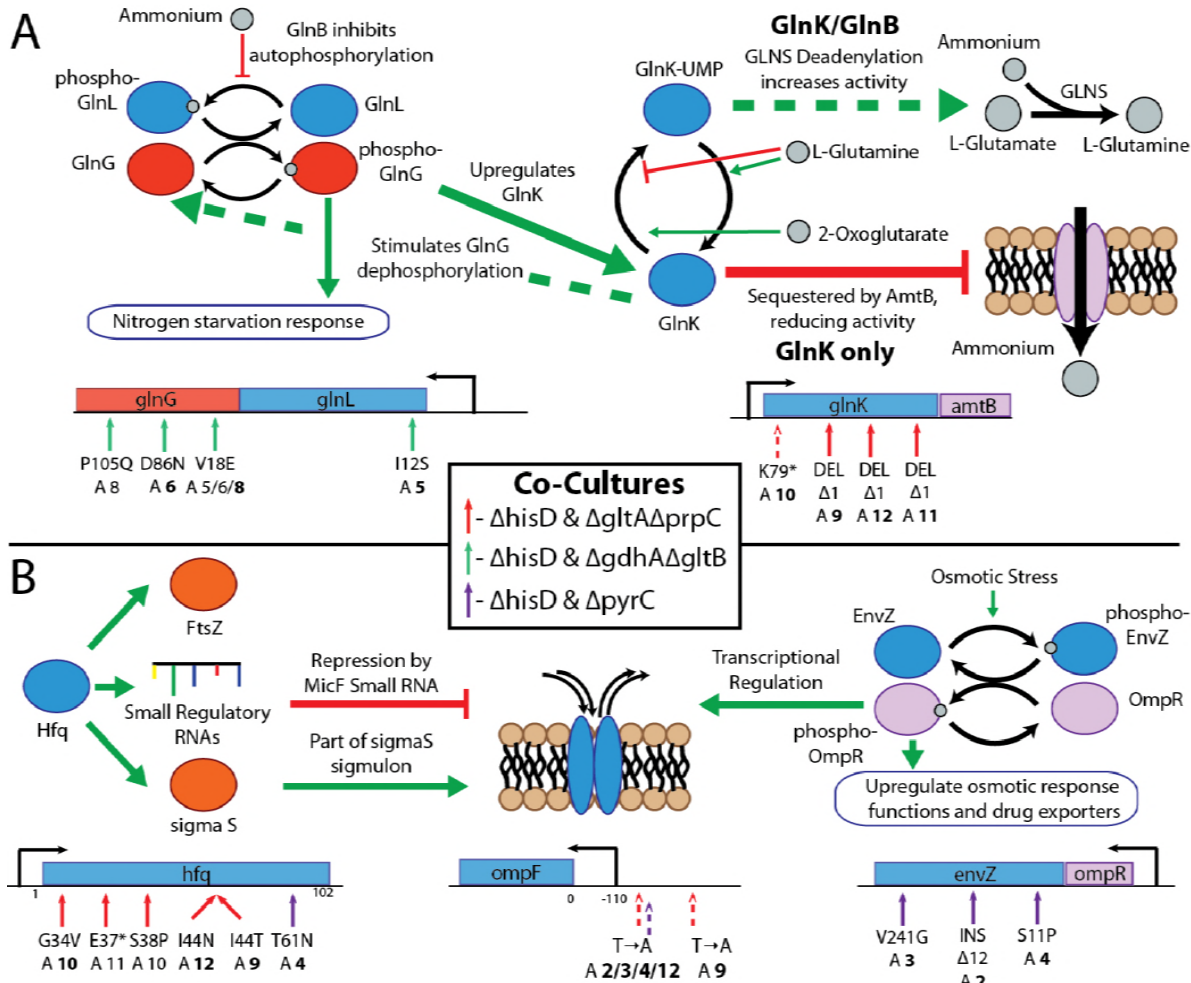

383

384

385 **Figure 6. Mutations Affecting Stress Responses and Metabolite Homeostasis.** Functions or putative functions of  
 386 mutated genes are summarized with schematics with the location of all mutations on the operon below the schematic.  
 387 Mutations are indicated on the operons schematic if mutations appear at >10% frequency in more than one flask and,  
 388 ALE numbers are in bold if the mutation appears in the endpoint clone strain. The mutations indicated with a dashed  
 389 arrow occurred in the  $\Delta$ hisD strain and solid arrow if they occurred in its partner MSE strain. **A:** Mutations observed  
 390 related to nitrogen starvation and metabolite homeostasis. Mutations were acquired within the open reading frame of  
 391 both genes comprising the nitrogen sensing two-component regulatory system. Shown in the schematic is the  
 392 regulatory cascade in which nitrogen is sensed by GlnL, which stimulates its autophosphorylation and subsequent

393 donation of the phosphorus group to GlnG. Phosphorylated GlnG upregulates general functions associated with  
394 nitrogen starvation. Further, mutations were observed in the ORF of GlnK, one of two nitrogen regulators, sharing  
395 most functions with GlnB. Both genes become uridylylated in response to high concentrations of 2-oxoglutarate and  
396 low concentrations of glutamine, which is an indication of low nitrogen concentration. GlnK-UMP can activate GLNS  
397 deadenylation, thus increasing its activity. Unlike GlnB, GlnK when in a deuridylylated state (high concentrations of  
398 glutamine) can be sequestered by the AmtB ammonium transporter causing it to have a reduction in activity [26]  
399 Dashed lines in the schematic indicate primary GlnB functions and solid lines indicate primary GlnK function. **B:**  
400 Mutations observed associated with the *E. coli* stress response. Numerous mutations were observed in the ORF of  
401 Hfq which is an RNA-binding protein with numerous global functions. These include interactions with small regulatory  
402 RNAs which are often required to enable the small RNA's regulatory function. Hfq is also required for the wild-type  
403 expression of the S sigma factor. Both MicF and sigma S are involved in regulating the expression of outer  
404 membrane porin *ompF*, a gene which acquired mutations in multiple ALE lineages. Mutations were also observed in  
405 the *envZ* ORF which is the sensory protein in the osmotic stress two-component regulatory system. Upon sensing  
406 osmotic stress, it autophosphorylates and transfers a phosphate to OmpR, thus upregulating osmotic stress genes.  
407 These genes consist of many outer membrane porins, including *ompF*.

408  
409 Mutations found in the  $\Delta gdhA\Delta glnB$  strains imply a change in the activity of the two-component  
410 nitrogen regulatory system. This strain in all  $\Delta hisD$  &  $\Delta gdhA\Delta glnB$  lineages acquired mutations  
411 in the open reading frame of at least one gene in the two-component nitrogen regulator system,  
412 *glnG* (*ntrC*) and *glnL* (*ntrB*) (**Figure 6A**) [64]. Amino acid substitutions were observed in  
413 position 18, 86, and 105 of *glnG* corresponding to the response receiver domain of GlnG, likely  
414 augmenting its ability interact with GlnL (based on protein families [66]). The endpoint clone of  
415 ALE #5 acquired an amino acid substitution of L-isoleucine to L-serine within a PAS domain of  
416 GlnL at position 12. This corresponds to the protein domain where regulatory ligands likely bind  
417 [67] so this mutation could act to augment its autophosphorylation activity in response to  
418 nitrogen. Given the location of these mutations, it can be hypothesized that they functioned to  
419 decrease the regulatory activity of the two-component system response to excess nitrogen. For

420 the  $\Delta gdhA\Delta gltB$  strain, this could be beneficial to reduce the GlnGL mediated downregulation of  
421 nitrogen uptake and assimilation processes.

422

423 Mutations were also observed affecting osmotic as well as nonspecific stress responses (**Figure**  
424 **6B**). These are summarized in the **Supplemental Text**.

## 425 Genome Duplications Complement Sequence Changes

426 A complementary adaptive strategy for improving co-culture community fitness was to acquire  
427 duplications in regions of the genome (**Figures S7-9**). In some cases, this evolutionary strategy  
428 appeared to function to amplify expression of transporters (also observed in [68]) to more  
429 efficiently uptake a metabolite that can rescue the strain's auxotrophy. Alternatively, these  
430 duplications could function to increase the likelihood of acquiring mutations in the duplicated  
431 region [69,70]. Therefore, the genes contained within the duplicated regions in some cases  
432 provided clues to which metabolites were cross-fed within the co-culture. For example, one of  
433 the three  $\Delta hisD$  &  $\Delta gdhA\Delta gltB$  lineages displayed clear increases in coverage near positions  
434 674-683 kbp and 1,391-1,402 kbp with multiplicities exceeding 15. The former of these  
435 coverage peaks included 9 genes, including the 4 genes composing the GltIJKL L-glutamate/L-  
436 aspartate ABC uptake system [71]. The latter peak included 10 genes including the 4 genes in  
437 the *abgRABT* operon, which facilitates the uptake and hydrolysis of p-aminobenzoyl-glutamate  
438 into glutamate and 4-aminobenzoate [72]. This suggests that both of these metabolites could be  
439 cross-fed to the  $\Delta gdhA\Delta gltB$  strain, though the *abgRABT* duplication was depleted in favor of  
440 the *gltIJKL* duplication over the course of the evolution, suggesting L-glutamate or L-aspartate is  
441 the preferred cross-feeding metabolite over p-aminobenzoyl-glutamate (**Figure 7**).

442

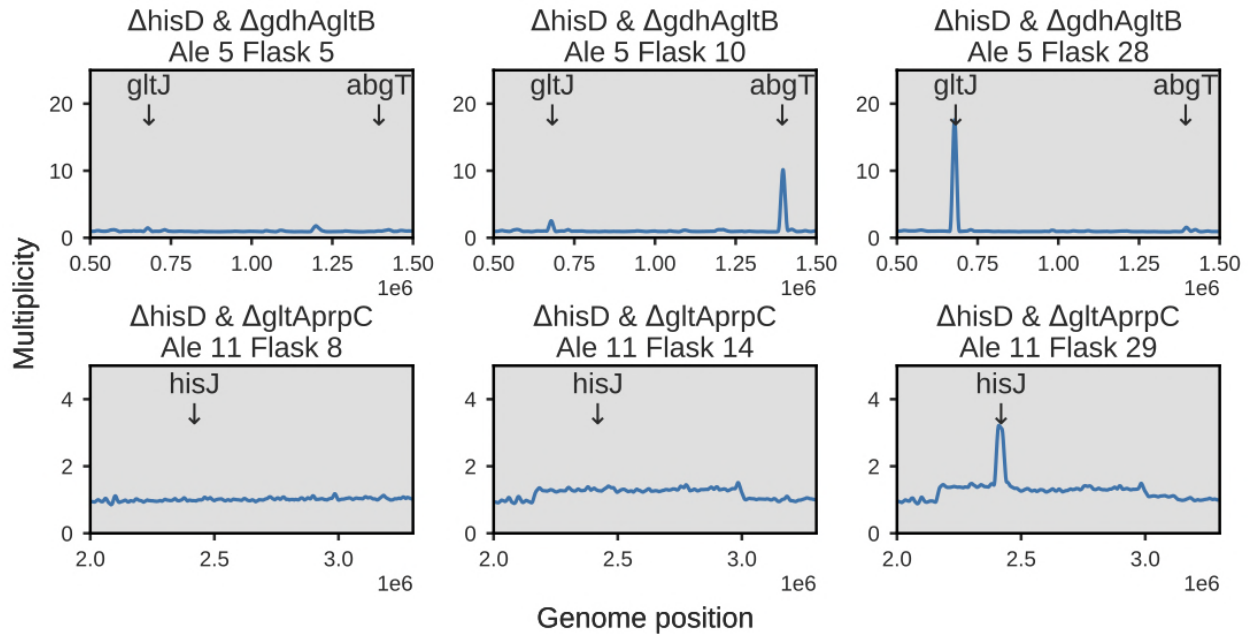

443

444 **Figure 7. Duplication Dynamics.** The top panel depicts the dynamics of two high multiplicity duplications in two  
445 transport complexes in *E. coli* throughout the course of Ale #5 of a  $\Delta hisD$  &  $\Delta gdhA\Delta gltB$  pair. A small region  
446 containing the *abgT* symporter of p-aminobenzoyl glutamate is duplicated early in the evolution, but is later replaced  
447 by duplications in a region containing *gltJ* and the rest of the genes comprising the GltIKJL L-glutamate/aspartate  
448 ABC uptake system. The bottom panel depicts the course of Ale #11, a  $\Delta hisD$  &  $\Delta gltA\Delta prpC$  co-culture, which  
449 initially showed a broad ~1Mbp duplication. By the end of the evolution either a nested duplication emerged or a  
450 significant subpopulation emerged that contained a duplication of a small genome region containing *hisJ* and the rest  
451 of the HisJMPQ L-histidine ABC uptake system.

452

453 While the duplications mentioned above presented clear amplifications in targeted operons,  
454 some observed duplications consisted of 100,000s of basepairs and 100s of genes. Further,  
455 many of the duplications seen in the populations were not observed in the sequenced endpoint  
456 clones. Possible explanations for these observations can be found in the **Supplemental Text**.

## 457 Modeling Community Features of Auxotroph Communities

458 Community ME-models were created for each of the three evolved co-culture sets (**Figure S10**).

459 The models were constructed based on the assumption that, in order to form a stable

460 community when growing exponentially, the strains in co-culture must be growing, on average,  
461 at an equal rate. Mass balance conversion terms could then be used to relate the metabolic flux  
462 that a strain contributes to the shared compartment and its fractional abundance (see  
463 **Methods**). This approach offered a means to understand which factors drive the structure of the  
464 newly established communities (i.e., the relative abundance of the community members) and,  
465 ultimately, how this relates to metabolite cross-feeding.

466  
467 The community ME-models have the capability of assessing how the community composition  
468 could vary depending on the identity of the metabolite that is cross-fed or the enzyme efficiency  
469 of the community members. The role of the cross-fed metabolites in defining the structure of the  
470 community was assessed using the community ME-models by: 1) allowing metabolic cross-  
471 feeding to remain unrestricted and 2) restricting the cross-feeding to only one metabolite. When  
472 the metabolite cross-feeding was left unrestricted (i.e., any metabolite restoring growth in either  
473 strain was allowed to cross-feed in the simulation, **Supplemental Text, Figure S11**) computed  
474 cross-feeding profiles were complex and prediction of the identity of the cross-fed metabolite did  
475 not strongly point to one potential metabolite (**Figure S12**). However, when turning to the  
476 sequencing data, there was general agreement between predicted and experimentally inferred  
477 optimal community structure which provided confidence in using the proposed modeling  
478 approach (**Figure S11**).

479  
480 Alternatively, the second approach to assess the influence of metabolite cross-feeding on  
481 community composition involved restricting the simulation to cross-feed only one of the  
482 metabolites computationally predicted to restore growth in the MSE strain. In doing so, the  
483 identity of the metabolite being cross-fed could be related to the optimal community growth rate  
484 and structure. This approach additionally offered a way to narrow the set of optimal or near  
485 optimal cross-feeding metabolites that would be predicted to be cross-fed *in vivo*. The

486 computations predicted that the  $\Delta hisD$  &  $\Delta pyrC$  co-culture would have a community composition  
487 and growth rate robust to the metabolite being cross-fed with a slightly higher community growth  
488 rate if orotate, uracil, uridine monophosphate, or uridine were cross-fed. The optimal  
489 composition of the community was predicted to be skewed toward low percentages (~20%) of  
490 the  $\Delta hisD$  strain for all metabolites in this co-culture. The  $\Delta hisD$  &  $\Delta gltA\Delta prpC$  and  $\Delta hisD$  &  
491  $\Delta gdhA\Delta gltB$  co-cultures, on the other hand, were sensitive to the cross-feeding metabolite  
492 where the community structure depended on the identity of the cross-feeding metabolite (**Figure**  
493 **8A**). For these two co-cultures, the  $\Delta hisD$  &  $\Delta gltA\Delta prpC$  and  $\Delta hisD$  &  $\Delta gdhA\Delta gltB$  pairs were  
494 computationally predicted to achieve higher community growth rates when cross-feeding L-  
495 glutamate, 2-oxoglutarate, citrate, or L-glutamine and 4-aminobutanoate, L-aspartate, L-  
496 glutamine, L-glutamate, L-alanine, or L-asparagine, respectively.  
497



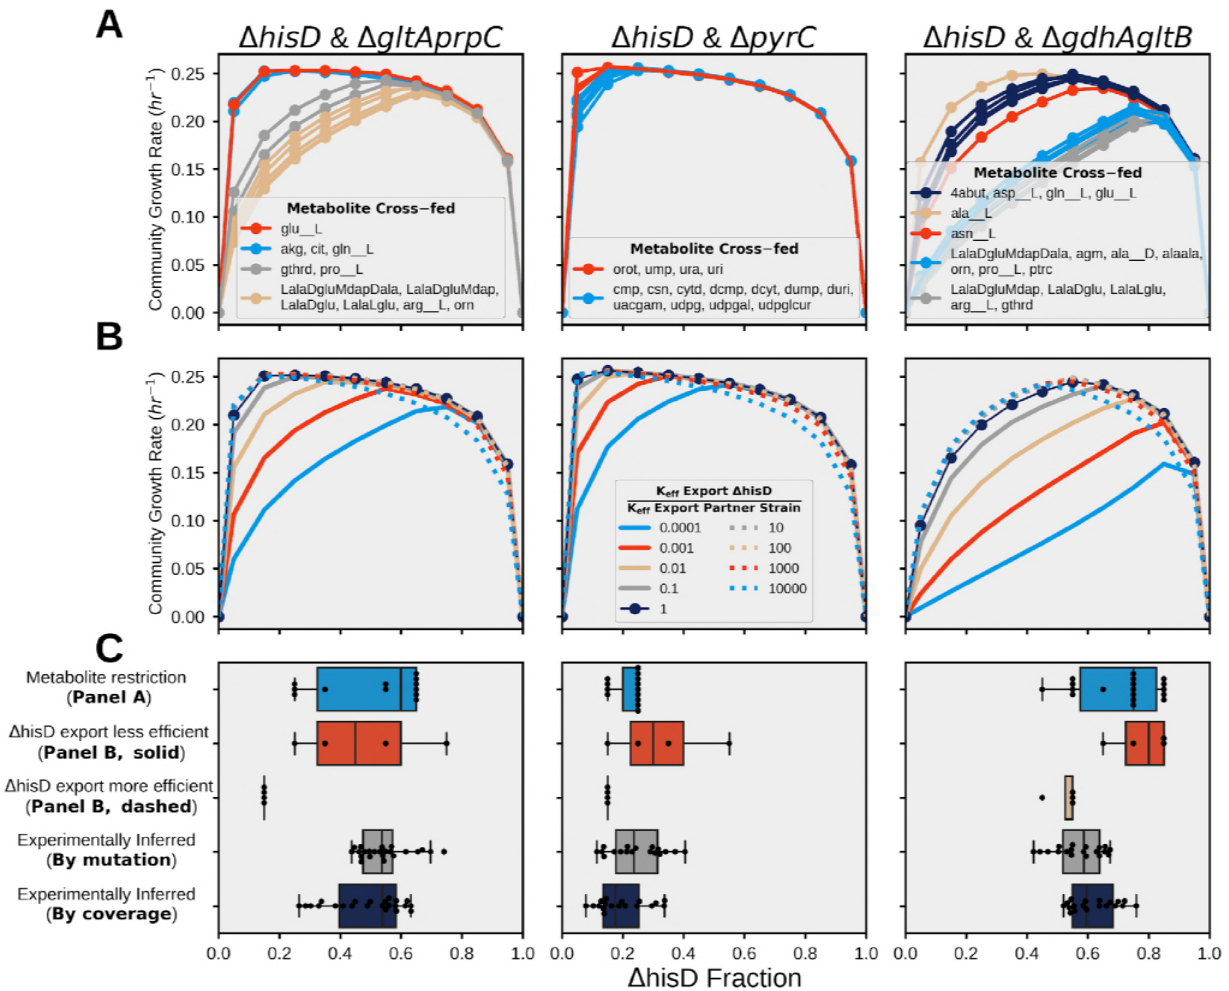

498

499 **Figure 8 Community Modeling.** Community ME-model predicted growth rates for fractional strain abundances of  
 500  $\Delta hisD$  ranging from 0 to 1. **A**) The effect of metabolite cross-feeding on community structure. Each curve was  
 501 computed by allowing different metabolites to be cross-fed to the MSE strain. Similar curves were grouped by color.  
 502 **B**) Effect of varying the proteome efficiency of metabolite export on community structure (see **Methods**). The analysis  
 503 was performed on models constrained to only cross-feed the metabolite that was inferred from the resequencing data  
 504 (2-oxoglutarate, orotate, and L-glutamate, respectively) (**Table 2**). **C**) Box plots of experimentally measured  
 505 abundances for each sample (bottom two rows, gray, and dark blue) and the computationally-predicted optimal strain  
 506 abundances following variation in the cross-feeding metabolite (top row, blue) and in strain proteome efficiency  
 507 (second and third row, red, and yellow).

508

509

510 Community ME-models further enable an examination of how each strain's proteome  
511 "efficiency" may affect co-culture characteristics when growing in its community niche. Such an  
512 analysis was performed by altering a ME-model parameter for each strain corresponding to how  
513 efficiently it can export the metabolite that is cross-feeding its partner strain (see **Methods**). This  
514 parameter can be used as a proxy for cellular proteome investment in wasteful or inefficient  
515 processes when synthesizing and exporting a metabolite, which is likely to occur in substantial  
516 amounts until the strains further adapt to grow as a community. That is, the cells will not be able  
517 to optimally rearrange their proteome and metabolic fluxes to efficiently grow as a community  
518 over this short-term evolution. It is possible, however, that some strains in co-culture will be able  
519 to reorganize their proteome to secrete the necessary metabolite more or less efficiently than  
520 their partner strain (**Table 2**). The proteome efficiency analysis showed that the community  
521 compositions of all three co-cultures were moderately sensitive to this parameter (**Figure 8B**).  
522 Further, the pairs showed a bimodal behavior depending on whether the  $\Delta hisD$  strain was more  
523 or less efficient than its partner (**Figure 8B**). The community models predicted that if the export  
524 processes of the  $\Delta hisD$  strain require a greater protein investment relative to the default export  
525 efficiency parameter, the abundances of the  $\Delta hisD$  strain will increase in the community.  
526 Conversely, if the partner strain requires greater protein investment, the community composition  
527 remains stable and unchanged. The optimal predicted community composition for the two  
528 analyses shown in **Figure 8A and B** are summarized in **Figure 8C**. The figure shows general  
529 agreement between the computed optimal community compositions and the experimentally  
530 inferred community composition, even after varying key features of the community simulation.  
531 This suggests that community ME-models have the potential to be useful tools for  
532 understanding the behavior of simple communities.

533

534 **Table 2. Metabolite being cross-fed by the  $\Delta hisD$  strain to its partner strain, as inferred from sequencing**  
535 **data**

536

| Pair with $\Delta hisD$  | Inferred Metabolite | Mutation Evidence                                                                                                                                                                                           | Duplication Evidence                                                                                                                                                        |
|--------------------------|---------------------|-------------------------------------------------------------------------------------------------------------------------------------------------------------------------------------------------------------|-----------------------------------------------------------------------------------------------------------------------------------------------------------------------------|
| $\Delta pyrC$            | Orotate             | Mutations in 5' UTR of <i>dctA</i> in $\Delta pyrC$ strain in all ALEs ( <b>Figure 5</b> )                                                                                                                  | Broad duplication in portion of genome containing <i>dctA</i> coding region in all ALEs ( <b>Figure S9, S4 Data</b> )                                                       |
| $\Delta gdhA\Delta gltA$ | L-Glutamate         | Ale #8 mutation in <i>ygjI</i> ORF in $\Delta hisD$ strain ( <b>Figure 5</b> )                                                                                                                              | ALE #5/6 targeted duplications in <i>gltJ</i> coding region ( <b>Figure 7, Figure S8</b> )<br>ALE #5 transient duplication in <i>abgT</i> coding region ( <b>Figure 7</b> ) |
| $\Delta gltA\Delta prpC$ | 2-Oxoglutarate      | Starting mutation in 5' UTR of <i>kgtP</i> in $\Delta gltA\Delta prpC$ strain ( <b>Table S5</b> )<br>ALE #9/10 Acquired mutations in <i>kgtP</i> ORF in $\Delta gltA\Delta prpC$ strain ( <b>Figure 5</b> ) | -                                                                                                                                                                           |

537

## 538 Discussion

539 This study has demonstrated a novel workflow to design, optimize, and computationally interpret  
540 non-trivial syntrophic co-cultures to better understand the characteristics of simple microbial  
541 community formation. The simple communities consisted of two strains of *E. coli* K-12 MG1655  
542 which required, in order to grow themselves, the growth of their partner strain. To design the  
543 communities to possess characteristics more attractive from an engineering perspective, a  
544 novel algorithm, termed OptAux, was used. This algorithm was used to design highly  
545 auxotrophic strains which, when paired in co-culture, require high levels of metabolic cross-  
546 feeding in order for the community to grow. Three co-cultures consisting of OptAux designs  
547 were tested *in vivo* and optimized via adaptive laboratory evolution. By analyzing the genetic  
548 changes observed throughout the evolution we could infer the cellular changes underlying  
549 improvements in the fitness of the highly metabolically-coupled communities. This work thus

550 provided new insight into cellular mechanisms for establishing syntrophic growth. A community  
551 ME-model was developed to computationally interpret the communities and their fundamental  
552 properties. Such models are the first to offer a means to study, on the genome-scale, how  
553 efficient proteome allocation to metabolic functions in the community members can influence the  
554 structure of the nascent microbial communities.

## 555 OptAux Can be Used to Design Novel Communities

556 To facilitate the design of co-culture communities requiring significant metabolic rewiring and  
557 cross-feeding, we constructed the OptAux algorithm to find reaction knockouts that will create  
558 auxotrophic strains requiring high amounts of metabolites for growth (**Figure 2**). OptAux  
559 returned two kinds of solutions depending on the parameters used, so-called Major Subsystem  
560 Elimination (MSE) and Essential Biomass Component Elimination (EBC) designs (**Figure 3**).  
561 EBC designs are specific with regard to which metabolites are required for the strain to grow  
562 and correspond to auxotrophs that have been validated in previous studies [14,50–54]. OptAux  
563 EBC predictions resulted in eight designs that were previously verified experimentally and five  
564 predictions of untested auxotrophs (**Table S1**). Conversely, the MSE designs are  
565 computationally predicted to grow when supplemented with a any of variety of different  
566 metabolites and represent largely new designs that have not been characterized experimentally,  
567 though some of the single gene knockout MSE designs were grown in co-culture in [16]. MSE  
568 auxotrophs in co-culture need high levels of cross-feeding in order to grow (0.05 and 0.2 mmol  
569  $\text{gDW}^{-1} \text{hr}^{-1}$  on average for an EBC and MSE strain to grow at a rate of  $0.1 \text{ hr}^{-1}$ , respectively),  
570 requiring significant metabolic rewiring in its partner strain (**Figure S13**).

## 571 ALE was Successfully Applied to Increase Fitness of Co-culture

572 Four OptAux predicted auxotrophic *E. coli* mutants were constructed *in vivo*, confirmed as  
573 auxotrophs, and grown in co-culture. A growth rate selection pressure was applied on these  
574 nascent, poorly growing communities via ALE. Three co-cultures of an  $\Delta hisD$  EBC strain paired  
575 with an MSE strain showed reproducible improvements in growth rate throughout the course of  
576 the ALE (**Table 1**). Under these conditions each of the strains had to rewire its metabolic  
577 network to both secrete a metabolite required by its partner strain and efficiently import the  
578 metabolite needed to grow itself through mutations that were identified, effectively establishing a  
579 new microbial community. By selecting for growth rate, a novel indirect selection pressure was  
580 applied on each strain to increase the secretion and uptake of the cross-fed metabolites, thus  
581 improving the growth of the co-culture community. This evolution design therefore has potential  
582 as a system to self-optimize microbial strains as industrial producers of metabolites of interest.

583

584 Throughout the course of adaptive laboratory evolution, the nascent communities improved  
585 community fitness by acquiring beneficial mutations (**Tables S5-7, Figures S7-9**). There was a  
586 high degree of parallelism in the identified shared mutations and duplications which appeared in  
587 each co-culture pair's ALE lineages, providing confidence that the acquired mutations and  
588 duplications were meaningful and causal in improving community fitness [73]. Consistently,  
589 duplications coincided with genome regions containing mutations acquired in endpoint clones. It  
590 has been shown that, as a mechanism for evolving new cellular functions, microbes duplicate  
591 genome regions to provide the redundancy needed for divergence of function or for acquiring  
592 new or altered capabilities [70]. Further, similar gene duplications in nutrient transporters have  
593 been shown in yeast to provide fitness benefits in glucose limited environments by increasing  
594 the expression of the transporter [68].

595

596 Beyond enabling an analysis of how the co-cultures were capable of establishing syntrophy, the  
597 sequencing data provided a measure of the structure of the community in terms of relative strain  
598 abundance. All auxotrophic mutants contained a unique characteristic starting mutation (**Table**  
599 **S3**), which was used to track the relative abundance of each member of the co-culture  
600 community throughout the evolutions. Community structures appeared to remain remarkably  
601 consistent both across ALE replicates of the same strain combinations and over time throughout  
602 the ALE lineages (**Table 1, Figures S4-5**). This finding was corroborated by using the coverage  
603 of the gene deletion regions in population resequencing (**Figures S5-6**). The observation of  
604 stable community composition is in line with what has been observed in multi-species microbial  
605 soil communities grown in single substrate minimal media [74].

## 606 Resequencing Data Provides Insight into Probable Metabolite 607 Cross-feeding

608 Mutational evidence, often related to transporter processes, from the evolved populations  
609 provided insight into which metabolites were being cross-fed within the co-cultures. For  
610 instance, all ALE lineages acquired mutations targeting the ABC uptake system for L-histidine  
611 (**Figure 5**). Given that all of the three evolved co-culture sets included a strain that was an EBC  
612 auxotroph for L-histidine, community growth logically would increase if histidine uptake was  
613 improved in this strain via these genetic changes. Similarly, the three MSE strains that were  
614 paired with the L-histidine auxotroph,  $\Delta pyrC$ ,  $\Delta gdhA\Delta gltB$  and  $\Delta gltA\Delta prpC$ , displayed evidence  
615 in their resequencing data to suggest that the strains were being cross-fed orotate, glutamate  
616 and 2-oxoglutarate, respectively (**Table 2**). A community ME-model was constructed for each of  
617 the three communities and the model simulations predicted a hierarchy, where clusters of  
618 metabolites provide slight benefits in predicted community growth rates relative to other

619 metabolites. In each case, the mutation data inferred cross-feeding metabolites were contained  
620 in one of the top computationally predicted clusters.

## 621 Community ME-modelling Allows for Analyzing Co-culture

### 622 Composition

623 Community ME-models were employed to understand how the proteome efficiency of each  
624 strain drives community composition. ME-models are uniquely capable of addressing this  
625 question because they directly incorporate the proteomic cost of catalyzing a metabolic process,  
626 which is particularly necessary in this system as there is an inherent proteome cost of each  
627 strain to cross-feed the necessary metabolite in co-culture [75]. Kinetic parameters, which play a  
628 role in dictating proteome cost in these community ME-models, were therefore systematically  
629 adjusted to understand how each strain's proteomic "efficiency" affected the simulation  
630 characteristics. The simulations predicted that, for all of the three co-cultures, the proteomic  
631 efficiency of the  $\Delta hisD$  would have the largest impact on the relative abundance of each co-  
632 culture member (**Figure 8B**). This is an expected finding due to the fact that the  $\Delta hisD$  strain  
633 has the larger cross-feeding burden since it is paired with an MSE strain in each case. Further,  
634 when the  $\Delta hisD$  secretion proteome efficiency was decreased, the community ME-model  
635 predicted its optimal abundance in the co-culture would actually increase. Though unintuitive,  
636 this prediction is in agreement with a paradox predicted in a previous computational study of  
637 community dynamics [76]. In addition to proteome efficiency, the ME-model predicted that the  
638 identity of the metabolite being cross-fed has an effect on optimal community composition  
639 (**Figure 8A**). The distributions of possible community compositions based on varying  
640 metabolites and proteome efficiency aligned well with two of the three co-cultures ( $\Delta hisD$  &  
641  $\Delta gdhA\Delta gltB$  and  $\Delta hisD$  &  $\Delta pyrC$ , **Figure 8C**). This implies that community ME-modelling

642 potentially offers a means to study how changes in the characteristics of each strain in co-  
643 culture will affect the optimal community structure and growth behavior.

644

645 From an industrial perspective, shifting the community composition could increase the  
646 production of a specific metabolite of interest. Therefore, this modeling method offers a way to  
647 predict how, for instance, LacZ or other unused (i.e., non beneficial) proteins could be efficiently  
648 overexpressed to lower a strain's proteome efficiency and alter community composition, thus  
649 improving the yield of metabolite secretion. Additionally, this modeling method suggests that the  
650 identity of the cross-feeding metabolite can bias the optimal community composition to some  
651 extent. For instance, for the  $\Delta hisD$  &  $\Delta gdhA\Delta gltB$  co-culture, the  $\Delta hisD$  relative fraction can vary  
652 from 0.45 to 0.85 if L-alanine is cross-fed versus L-arginine. By somehow biasing the cross-  
653 feeding toward one metabolite or the other (e.g., exporter knockout), the community  
654 composition could potentially be manipulated, thus altering the yield of the cross-fed metabolite.

## 655 Conclusions

656 This work demonstrated a novel approach using both a design algorithm and community  
657 modeling to understand how strains adapt to grow in new community niches. The work also  
658 provided insight into evolutionary strategies bacteria can use to readjust their metabolism and  
659 respond to drastic changes in homeostatic metabolite concentrations while learning to inhabit  
660 this new biological niche. Beyond better understanding ecological communities, this workflow  
661 could be applied as a tool for developing new platform bacterial strains for producing  
662 metabolites of industrial relevance. Lastly, the novel community resource allocation model was  
663 successfully used to predict co-culture community characteristics. This modeling tool could be  
664 leveraged to predict experimental strategies for optimizing a community to fit the desired  
665 application and have broad impacts on human health [77,78].



## 666 Materials and Methods

### 667 Computational Methods

668 All constraints based modeling analyses were performed in Python using the COBRApy  
669 software package [79] and the *iJO1366* metabolic model of *E. coli* K-12 MG1655 [41]. For  
670 aerobic simulations the maximum oxygen uptake rate was constrained to  $20 \text{ mmol} \cdot \text{dDW}^{-1} \cdot \text{hr}^{-1}$ ,  
671 and the maximum substrate was constrained to  $10 \text{ mmol} \cdot \text{dDW}^{-1} \cdot \text{hr}^{-1}$ . All *iJO1366*  
672 optimizations and algorithm solutions presented were found using the Gurobi (Gurobi  
673 Optimization, Inc., Houston, TX) mixed-integer linear programming (MILP) or linear  
674 programming (LP) solver. The community ME-models were solved using the qMINOS solver in  
675 quad precision [87,88]. All scripts and data used to create the presented results can be found at  
676 [www.github.com/coltonlloyd/optaux](http://www.github.com/coltonlloyd/optaux).

### 677 OptAux Algorithm Formulation

678 The OptAux algorithm was derived based on the ideas from existing MILP algorithms (i.e.,  
679 RobustKnock [40] and OptKnock [80]). A new algorithm was written as opposed to  
680 implementing a “reverse” version of RobustKnock where the algorithm would optimize the  
681 uptake of a metabolite at the maximum growth rate. A “reverse” RobustKnock implementation  
682 would lead to strain designs that must take up a high amount of the target metabolite when  
683 approaching the maximum growth rate (**Figure S1A**). In order for a strain to be truly auxotrophic  
684 for a particular metabolite, however, it must be required at all growth rates (**Figure 2A, Figure**  
685 **S1B**). To ensure that OptAux designs have this auxotrophic phenotype, the inner problem  
686 optimizing for growth rate utilized in RobustKnock was replaced with a *set\_biomass* constraint.  
687 This forced the metabolite uptake optimization to occur at a predefined growth rate and was

688 implemented by setting the upper and lower bounds of the biomass objective function to this  
689 value:

$$690 \quad v_{biomass} = \text{set\_biomass}$$

691 For the simulations ran in this study (**S1 Data**), the `set_biomass` value was set as 1/10 the  
692 maximum growth rate for the wild-type simulation in *in silico* glucose minimal media  
693 supplemented with the metabolite whose uptake is being maximized.

694  
695 An additional constraint was applied to represent additional metabolites present in the media. It  
696 was applied by finding all metabolites with exchange reactions with its lower bound set to zero  
697 and increases the bound to the `trace_metabolite_threshold`, shown for exchange reaction  $i$   
698 below:

$$699 \quad v_{uptake_i} \leq \text{trace\_metabolite\_threshold}$$

700 Increasing this threshold ultimately increases the specificity of the OptAux solution in regards to  
701 other metabolites that can potentially restore growth. In other words, this effectively models a  
702 scenario where, along with the presence of the target metabolite and primary substrate, there  
703 are trace amounts of competing energy source and biosynthetic precursor metabolites in the *in*  
704 *silico* media.

705  
706 The resulting algorithm is a bilevel MILP (**Figure 2B**) that can be found at  
707 [www.github.com/coltonlloyd/optaux](http://www.github.com/coltonlloyd/optaux).

## 708 OptAux Simulations

709 The OptAux algorithm was ran for all carbon containing metabolites with exchange reactions in  
710 *iJO1366*. For each optimization the target metabolite is selected and the maximum uptake of the  
711 metabolite is set to 10 mmol/gDW/hr. The model was then reduced by performing flux variability

712 analysis (FVA) on every reaction in the model and setting the upper and lower bounds of each  
713 reaction to the FVA results. If FVA computed that no flux could be carried through the reaction,  
714 then it was removed from the model. Additionally, reactions were excluded from knockout  
715 consideration if they met one of the following criteria: **1)** it is a *iJO1366* false positive when  
716 glucose is the primary carbon substrate [81] **2)** it is essential in LB rich media [15] **3)** its  
717 annotated subsystem is one of the following: Cell Envelope Biosynthesis, Exchange, Inorganic  
718 Ion Transport and Metabolism, Lipopolysaccharide Biosynthesis / Recycling, Murein  
719 Biosynthesis, Murein Recycling, Transport, Inner Membrane, Transport, Outer Membrane,  
720 Transport, Outer Membrane Porin, or tRNA Charging **4)** it involves a metabolite with more than  
721 10 carbons **5)** it is a spontaneous reaction.

## 722 Identifying Gene Mutations and Duplications

723 The FASTQ data from the samples sequencing was filtered and trimmed using AfterQC version  
724 0.9.6 [82]. The quality controlled reads were aligned to the genome sequence of *E. coli* K-12  
725 BW25113 (CP009273.1) [83] using Bowtie2 version 2.3.0 [84]. Mutations were identified based  
726 on the aligned reads using breseq version 0.32.0b [55]. If the sample was of a co-culture  
727 population and not a clone, the predict polymorphism option was used with a frequency cutoff of  
728 0.025. The output of the breseq mutation analysis for all samples can be found in **S3 Data**.

729  
730 Duplications were found by analyzing the BAM sequence alignment files output from Bowtie  
731 using the pysam Python package [85]. Pysam was used to compute the sequencing read  
732 coverage at each DNA position within the genome sequence. For population samples, a cutoff  
733 of 1.25 x coverage fit mean (measure of average read alignment coverage over the genome), a  
734 relatively low threshold to account for the varying fractional abundances of the strains in  
735 community. A gene was flagged as duplicated in the sample if over 80% of the base pairs in the  
736 gene ORF had alignment coverage above the duplication threshold. Duplications found in

737 starting strains were excluded from duplication analysis. Further the set of duplicated genes  
738 were grouped together if there are located next to each other on the genome. A new group was  
739 made if there was more than five genes separating a duplicated gene from the next duplicated  
740 gene (**S4 Data**).

741  
742 Aligned contig coverage across the *E. coli* genome is noisy and therefore must be filtered before  
743 plotting in order to observe its dominant features. This was accomplished by first splitting the  
744 coverage vector into 50,000 segments such that each segment represented ~100 base pairs  
745 and the average of the segments was found. Locally weighted scatterplot smoothing (LOWESS)  
746 was then applied to the array of concatenated segments using the statsmodel package in  
747 python [86]. For the smoothing 0.5% of all of the segments was used when estimating each  
748 coverage value (y-value), and zero residual-based reweightings were performed. The remaining  
749 parameters were set to their default.

## 750 Calculating Strain Abundances from Resequencing Data

751 The fractional strain abundance of each strain in co-culture were predicted using two features of  
752 the resequencing data of each co-culture population sample: **1)** the frequency of characteristic  
753 mutations of each strain and **2)** the relative coverage of the knocked out genes.

754  
755 Each of the stains used in this study possessed a unique characteristic mutation (**Table S3**),  
756 which could be used as a barcode to track the strain. The breseq population mutation calling  
757 pipeline would identify the characteristic mutations of each strain in co-culture and report the  
758 frequency that the mutation occurred. This output was used to track their presence. For strains  
759 with two characteristic mutations ( $\Delta hisD$ ,  $\Delta gdhA\Delta gltB$ ) the average of the frequency of each  
760 gene was used as a prediction of the relative abundance of that strain. One mutation in  
761 particular, an IS element insertion in *yqiC* which is characteristic of the  $\Delta hisD$  strain, was not

762 detected in several samples when  $\Delta hisD$  was in co-culture with  $\Delta pyrC$ . This is likely due to the  
763 low frequency of the  $\Delta hisD$  strain in that particular population. In those cases, the  $\Delta hisD$  strain  
764 abundance was predicted using only the frequency of the *IrhA/alaA* intergenic SNP (**Figure S5**).

765  
766 The second method used the contig read alignment to compare the coverage of the deleted  
767 genes in each strain to the fit mean coverage of the sample. As an example, for a strain paired  
768 with the  $\Delta hisD$  strain, the average coverage of the base pairs in the *hisD* ORF divided by the fit  
769 mean for that sample, would give an approximation of its relative abundance in the population.  
770 As with the characteristic mutation approach, if the two genes are knocked out in the strain, the  
771 average coverage of the two genes is used to make the approximation (**Figure S5**).

772  
773 When reporting the relative abundance predictions, the predicted abundances of each strain  
774 was normalized by the sum of the predicted abundances of the two strains in co-culture. This  
775 ensured that the abundance predictions summed to one. Predictions made using the two  
776 described methods showed general agreement (**Figure S6**).

## 777 Community Modeling

778 Community ME-models were created using a multicompartment FBA approach, where each of  
779 the two mutant strains in co-culture occupy a compartment with an additional shared  
780 compartment where each of the strains can exchange metabolites. The relative abundance of  
781 each strain was accounted for by adjusting the exchange reaction from a strain's compartment  
782 into the shared compartments. For secretion, this was done by multiplying these exchange  
783 reactions as follows:

784

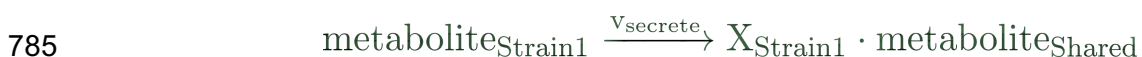

786

787 and for uptake:

788

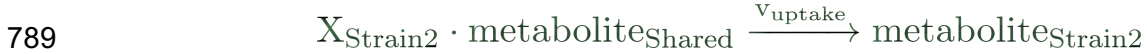

790

791 where  $v_{\text{secrete}}$  is the secretion flux from strain 1 and has units of  $\text{mmol} \cdot \text{gDW}_{\text{Strain1}}^{-1} \cdot \text{hr}^{-1}$  and

792  $X_{\text{Strain1}}$  is the fractional abundance of strain 1 with units of  $\text{gDW}_{\text{Strain1}} \cdot \text{gDW}_{\text{Community}}^{-1}$ . Therefore

793 applying this coefficient to  $\text{metabolite}_{\text{Shared}}$  gives the reaction fluxes from strain 1 ( $v_{\text{secrete}}$ ) in units

794 of  $\text{mmol} \cdot \text{gDW}_{\text{Community}}^{-1} \cdot \text{hr}^{-1}$ . For the subsequent uptake of the shared metabolite by strain 2,

795 the fractional abundance of strain 2 is applied giving units of  $\text{mmol} \cdot \text{gDW}_{\text{Strain2}}^{-1} \cdot \text{hr}^{-1}$  (**Figure**

796 **S10**).

797

798 Using this community modeling approach, the fractional abundance ( $X_i$ ) of each strain in the co-

799 culture was implemented as a parameter that could be varied from 0 to 1, which in turn had on

800 impact on the optimal growth state of the community. Simulations were ran varying  $X_{\text{Strain1}}$

801 (abundance of strain 1) from 0.05 to 0.95 and the community growth rate was optimized. The

802 metabolites that were allowed to be cross-fed in simulation were limited to the set of metabolites

803 that can computationally restore the growth of each auxotroph (**Table S4**).

804

805 For the community simulations, the *iJL1678b* [32] model of *E. coli* K-12 MG1655 was used with

806 the uptake of metabolites in the *in silico* glucose minimal growth media into the shared

807 compartment left unconstrained, as the ME-model is self limiting [33]. The non-growth

808 associated ATP maintenance and the growth associated ATP maintenance were set to the

809 default parameter values in the model. The RNA degradation constraints were removed to

810 prevent high ATP costs at the low community growth rates. Since, the newly formed

811 communities are highly unoptimized and growing slowly, the unmodeled/unused protein fraction  
812 parameter was set to 75%. If a metabolite had a reaction to import the metabolite across the  
813 inner membrane, but no export reaction, a reaction to transport the metabolite from the cytosol  
814 to the periplasm was added to the model. For more on the model parameters, refer to [32] and  
815 [33].

816  
817 To vary the proteomic efficiency ( $k_{\text{eff}}$ ) of the export metabolites, first the exchange reaction into  
818 the shared compartment for all potential cross-feeding metabolites except the metabolites  
819 inferred from the experimental data (**Table 2**) was constrained to zero. Then the enzymatic  
820 efficiency of the outer membrane transport process of only the inferred metabolite was altered in  
821 each strain. The outer membrane transport reactions for each inferred metabolite (i.e., HlStex,  
822 GLUtex, AKGtex, and OROtTex for L-histidine, L-glutamate, 2-oxoglutarate, and orotate,  
823 respectively) have multiple outer membrane porins capable of facilitating the transport process.  
824 To account for this the  $k_{\text{eff}}$  kinetic parameter of each of porin and reaction changed by  
825 multiplying the default  $k_{\text{eff}}$  value by the appropriate multiplier. The COBRAME software was used  
826 for all ME-model manipulations [32].

## 827 Reproducibility

828 All code and data necessary to reproduce the results can be found on GitHub at  
829 <https://github.com/coltonlloyd/OptAux>.

## 830 Experimental Methods

### 831 *E. Coli* Strain Construction

832 All single gene knockouts used in this work were obtained from the Keio collection, a collection  
833 of all single gene knockouts in *E. coli* K-12 BW25113 [15]. To generate double gene knockout  
834 strains, the second knockout genes were identified from the Keio collection as donor strains,  
835 and their P1 phage lysates were generated for the transduction into the receiving single KO  
836 strains. For instance, the  $\Delta gltA$  or  $\Delta gltB$  knockout strain was a donor strain and the  $\Delta prpC$  or  
837  $\Delta gdhA$  knockout strain was a receiving strain (**Table S2**). These four knockout strains were  
838 used for the construction of double knockout strains of  $\Delta gltA\Delta prpC$  and  $\Delta gdhA\Delta gltB$ . Each  
839 mutant was confirmed not to grow in glucose M9 minimal media without supplementation of an  
840 auxotrophic metabolite predicted by the *iJO1366* model.

### 841 Adaptive Laboratory Evolution

842 Cultures were initially inoculated with equal numbers of cells from the two relevant auxotrophs,  
843 then serially propagated (100  $\mu$ L passage volume) in 15 mL (working volume) flasks of M9  
844 minimal medium with 4 g/L glucose, kept at 37°C and well-mixed for full aeration. An automated  
845 system passed the cultures to fresh flasks once they had reached an OD600 of 0.3 (Tecan  
846 Sunrise plate reader, equivalent to an OD600 of ~1 on a traditional spectrophotometer with a 1  
847 cm path length), a point at which nutrients were still in excess and exponential growth had not  
848 started to taper off. Four OD600 measurements were taken from each flask, and the slope of  
849  $\ln(\text{OD600})$  vs. time determined the culture growth rates.



## 850 Resequencing

851 Co-culture populations samples were collected at multiple points throughout the ALE and  
852 sequenced. Additionally, the starting mutant strains and both mutants isolated from the ALE  
853 endpoint samples were sequenced. The  $\Delta hisD$  endpoint clone was unable to be isolated via  
854 colony selection for ALE #11 . Genomic DNA of the co-culture populations and mutant clones  
855 was isolated using the Macherey-Nagel NucleoSpin tissue kit, following the manufacturer's  
856 protocol for use with bacterial cells. The quality of isolated genomic DNA was assessed using  
857 Nanodrop UV absorbance ratios. DNA was quantified using the Qubit double-stranded DNA  
858 (dsDNA) high-sensitivity assay. Paired-end whole genome DNA sequencing libraries were  
859 generated using Illumina's Kappa kit and run on an Illumina MiSeq platform with a PE600v3 kit.  
860 DNA sequencing data from this study will be made available on the Sequence Read Archive  
861 database (submission no. SUB3903910).

## 862 Acknowledgements

863 We thank Richard Szubin for help preparing samples for resequencing and thank Joshua  
864 Lerman and Justin Tan for informative discussions. This research used resources of the  
865 National Energy Research Scientific Computing Center, which is supported by the Office of  
866 Science of the US Department of Energy under Contract No. DE-AC02-05CH11231. Funding  
867 for this work was provided by the Novo Nordisk Foundation through the Center for  
868 Biosustainability at the Technical University of Denmark [NNF10CC1016517]. CJL was  
869 supported by the National Science Foundation Graduate Research Fellowship under Grant no.  
870 DGE-1144086.

## 871 Author contributions

872 C.J.L., Z.A.K. and A.M.F. designed the study. C.J.L. and Z.A.K. developed OptAux. C.J.L. and  
873 E.J.O. developed the community ME-modeling method. C.J.L. performed all computation and  
874 analysis. Y.H. and C.A.O. constructed all *E. coli* mutant strains and T.S. performed the adaptive  
875 laboratory evolution. C.J.L. and A.M.F. wrote the manuscript and all authors reviewed the text  
876 and provided edits.

## 877 Conflict of interest

878 The authors have no conflicts of interest to declare

879

## 880 Supporting Information

881 **S1 Data. OptAux Solutions.** Output of the OptAux algorithm ran for one, two, and three  
882 reaction knockouts on glucose minimal media for all carbon containing exchange metabolites.  
883 Four different trace metabolite thresholds were used (0, 0.01, 0.1, 2).

884

885 **S2 Data. Major Subsystem Elimination Designs.** All MSE designs along with further  
886 information regarding the subsystems of the reaction knockouts and the metabolites that can  
887 restore growth in each design.

888

889 **S3 Data. Mutations.** The breseq identified mutations for all samples collected in this work. Both  
890 the full output and a table with only mutations observed in the endpoint clones are provided.

891

892 **S4 Data. Duplications.** Genes with read coverage meeting the duplication criteria. Seperate  
893 spreadsheets are provided for all samples using the mutant pair, ale number, flask number,  
894 isolate number, and replicate number to identify each sample.

## 895 Citations

- 896 1. Rittmann BE, Hausner M, Löffler F, Love NG, Muyzer G, Okabe S, et al. A vista for  
897 microbial ecology and environmental biotechnology. *Environ Sci Technol.* 2006;40: 1096–  
898 1103.
- 899 2. Minty JJ, Singer ME, Scholz SA, Bae C-H, Ahn J-H, Foster CE, et al. Design and  
900 characterization of synthetic fungal-bacterial consortia for direct production of isobutanol  
901 from cellulosic biomass. *Proc Natl Acad Sci U S A.* 2013;110: 14592–14597.
- 902 3. Bernstein HC, Carlson RP. Microbial Consortia Engineering for Cellular Factories: in vitro to  
903 in silico systems. *Comput Struct Biotechnol J.* 2012;3: e201210017.
- 904 4. Zuroff TR, Xiques SB, Curtis WR. Consortia-mediated bioprocessing of cellulose to ethanol  
905 with a symbiotic *Clostridium phytofermentans*/yeast co-culture. *Biotechnol Biofuels.* 2013;6:  
906 59.
- 907 5. Briones A, Raskin L. Diversity and dynamics of microbial communities in engineered  
908 environments and their implications for process stability. *Curr Opin Biotechnol.* 2003;14:  
909 270–276.
- 910 6. Zhang H, Pereira B, Li Z, Stephanopoulos G. Engineering *Escherichia coli* coculture  
911 systems for the production of biochemical products. *Proc Natl Acad Sci U S A.* 2015;112:  
912 8266–8271.
- 913 7. Zhou K, Qiao K, Edgar S, Stephanopoulos G. Distributing a metabolic pathway among a  
914 microbial consortium enhances production of natural products. *Nat Biotechnol.* 2015;33:  
915 377–383.

- 916 8. Saini M, Chen MH, Chiang C-J, Chao Y-P. Potential production platform of n-butanol in  
917 Escherichia coli. *Metab Eng.* 2015;27: 76–82.
- 918 9. Flint HJ. The impact of nutrition on the human microbiome. *Nutr Rev.* 2012;70: S10–S13.
- 919 10. Magnúsdóttir S, Heinken A, Kutt L, Ravcheev DA, Bauer E, Noronha A, et al. Generation of  
920 genome-scale metabolic reconstructions for 773 members of the human gut microbiota. *Nat*  
921 *Biotechnol.* 2017;35: 81–89.
- 922 11. Adamowicz EM, Hunter RC, Flynn J, Harcombe WR. Cross-feeding modulates antibiotic  
923 tolerance in bacterial communities [Internet]. *bioRxiv.* 2018. p. 243949. doi:10.1101/243949
- 924 12. Hosoda K, Suzuki S, Yamauchi Y, Shiroguchi Y, Kashiwagi A, Ono N, et al. Cooperative  
925 adaptation to establishment of a synthetic bacterial mutualism. *PLoS One.* 2011;6: e17105.
- 926 13. Hosoda K, Yomo T. Designing symbiosis. *Bioeng Bugs.* 2011;2: 338–341.
- 927 14. Mee MT, Collins JJ, Church GM, Wang HH. Syntrophic exchange in synthetic microbial  
928 communities. *Proc Natl Acad Sci U S A.* 2014;111: E2149–56.
- 929 15. Baba T, Ara T, Hasegawa M, Takai Y, Okumura Y, Baba M, et al. Construction of  
930 Escherichia coli K-12 in-frame, single-gene knockout mutants: the Keio collection. *Mol Syst*  
931 *Biol.* 2006;2: 2006.0008.
- 932 16. Wintermute EH, Silver PA. Emergent cooperation in microbial metabolism. *Mol Syst Biol.*  
933 2010;6: 407.
- 934 17. Zhang X, Reed JL. Adaptive evolution of synthetic cooperating communities improves  
935 growth performance. *PLoS One.* 2014;9: e108297.
- 936 18. Hillesland KL, Stahl DA. Rapid evolution of stability and productivity at the origin of a

- 937 microbial mutualism. *Proc Natl Acad Sci U S A*. 2010;107: 2124–2129.
- 938 19. Zomorodi AR, Segrè D. Synthetic Ecology of Microbes: Mathematical Models and  
939 Applications. *J Mol Biol*. 2016;428: 837–861.
- 940 20. Perez-Garcia O, Lear G, Singhal N. Metabolic Network Modeling of Microbial Interactions in  
941 Natural and Engineered Environmental Systems. *Front Microbiol*. 2016;7: 673.
- 942 21. Klitgord N, Segrè D. Environments that induce synthetic microbial ecosystems. *PLoS*  
943 *Comput Biol*. 2010;6: e1001002.
- 944 22. Freilich S, Zarecki R, Eilam O, Segal ES, Henry CS, Kupiec M, et al. Competitive and  
945 cooperative metabolic interactions in bacterial communities. *Nat Commun*. 2011;2: 589.
- 946 23. Chan SHJ, Simons MN, Maranas CD. SteadyCom: Predicting microbial abundances while  
947 ensuring community stability. *PLoS Comput Biol*. 2017;13: e1005539.
- 948 24. Chiu H-C, Levy R, Borenstein E. Emergent biosynthetic capacity in simple microbial  
949 communities. *PLoS Comput Biol*. 2014;10: e1003695.
- 950 25. Harcombe WR, Riehl WJ, Dukovski I, Granger BR, Betts A, Lang AH, et al. Metabolic  
951 resource allocation in individual microbes determines ecosystem interactions and spatial  
952 dynamics. *Cell Rep*. 2014;7: 1104–1115.
- 953 26. Zomorodi AR, Segrè D. Genome-driven evolutionary game theory helps understand the  
954 rise of metabolic interdependencies in microbial communities. *Nat Commun*. 2017;8: 1563.
- 955 27. Zomorodi AR, Maranas CD. OptCom: a multi-level optimization framework for the  
956 metabolic modeling and analysis of microbial communities. *PLoS Comput Biol*. 2012;8:  
957 e1002363.

- 958 28. Feist AM, Palsson BO. The biomass objective function. *Curr Opin Microbiol.* 2010;13: 344–  
959 349.
- 960 29. Biliouris K, Babson D, Schmidt-Dannert C, Kaznessis YN. Stochastic simulations of a  
961 synthetic bacteria-yeast ecosystem. *BMC Syst Biol.* 2012;6: 58.
- 962 30. Oliveira NM, Niehus R, Foster KR. Evolutionary limits to cooperation in microbial  
963 communities. *Proc Natl Acad Sci U S A.* 2014;111: 17941–17946.
- 964 31. Germerodt S, Bohl K, Lück A, Pande S, Schröter A, Kaleta C, et al. Pervasive Selection for  
965 Cooperative Cross-Feeding in Bacterial Communities. *PLoS Comput Biol.* 2016;12:  
966 e1004986.
- 967 32. Lloyd CJ, Ebrahim A, Yang L, King ZA, Catoiu E, O'Brien EJ, et al. COBRAME: A  
968 Computational Framework for Building and Manipulating Models of Metabolism and Gene  
969 Expression [Internet]. *bioRxiv.* 2017. p. 106559. doi:10.1101/106559
- 970 33. O'Brien EJ, Lerman JA, Chang RL, Hyduke DR, Palsson BO.  
971 Genome-scale models of metabolism and gene expression extend and refine growth  
972 phenotype prediction. *Mol Syst Biol.* 2014;9: 693–693.
- 973 34. Lerman JA, Hyduke DR, Latif H, Portnoy VA, Lewis NE, Orth JD, et al. In silico method for  
974 modelling metabolism and gene product expression at genome scale. *Nat Commun.*  
975 2012;3: 929.
- 976 35. Wilson M, Lindow SE. Coexistence among Epiphytic Bacterial Populations Mediated  
977 through Nutritional Resource Partitioning. *Appl Environ Microbiol.* 1994;60: 4468–4477.
- 978 36. Zhao Q, Segre D, Paschalidis IC. Optimal allocation of metabolic functions among  
979 organisms in a microbial ecosystem. 2016 IEEE 55th Conference on Decision and Control

- 980 (CDC). 2016. doi:10.1109/cdc.2016.7799357
- 981 37. Teague BP, Weiss R. SYNTHETIC BIOLOGY. Synthetic communities, the sum of parts.  
982 Science. 2015;349: 924–925.
- 983 38. Polz MF, Cordero OX. Bacterial evolution: Genomics of metabolic trade-offs. Nat Microbiol.  
984 2016;1: 16181.
- 985 39. Feist AM, Zielinski DC, Orth JD, Schellenberger J, Herrgard MJ, Palsson BØ. Model-driven  
986 evaluation of the production potential for growth-coupled products of Escherichia coli.  
987 Metab Eng. 2010;12: 173–186.
- 988 40. Tepper N, Shlomi T. Predicting metabolic engineering knockout strategies for chemical  
989 production: accounting for competing pathways. Bioinformatics. 2010;26: 536–543.
- 990 41. Orth JD, Conrad TM, Na J, Lerman JA, Nam H, Feist AM, et al. A comprehensive genome-  
991 scale reconstruction of Escherichia coli metabolism--2011. Mol Syst Biol. 2011;7: 535.
- 992 42. Zengler K, Zaramela LS. The social network of microorganisms — how auxotrophies shape  
993 complex communities. Nat Rev Microbiol. 2018; doi:10.1038/s41579-018-0004-5
- 994 43. Fotheringham IG, Dacey SA, Taylor PP, Smith TJ, Hunter MG, Finlay ME, et al. The  
995 cloning and sequence analysis of the aspC and tyrB genes from Escherichia coli K12.  
996 Comparison of the primary structures of the aspartate aminotransferase and aromatic  
997 aminotransferase of E. coli with those of the pig aspartate aminotransferase isoenzymes.  
998 Biochem J. 1986;234: 593–604.
- 999 44. Thèze J, Margarita D, Cohen GN, Borne F, Patte JC. Mapping of the structural genes of the  
1000 three aspartokinases and of the two homoserine dehydrogenases of Escherichia coli K-12.  
1001 J Bacteriol. 1974;117: 133–143.



- 1002 45. Glansdorff N. TOPOGRAPHY OF COTRANSDUCIBLE ARGININE MUTATIONS IN  
1003 ESCHERICHIA COLI K-12. *Genetics*. 1965;51: 167–179.
- 1004 46. Jones-Mortimer MC. Positive control of sulphate reduction in *Escherichia coli*. Isolation,  
1005 characterization and mapping of cysteineless mutants of *E. coli* K12. *Biochem J*. 1968;110:  
1006 589–595.
- 1007 47. Sirko AE, Zatyka M, Hulanicka MD. Identification of the *Escherichia coli* *cysM* gene  
1008 encoding O-acetylserine sulphhydrylase B by cloning with mini-Mu-lac containing a plasmid  
1009 replicon. *J Gen Microbiol*. 1987;133: 2719–2725.
- 1010 48. Somers JM, Amzallag A, Middleton RB. Genetic fine structure of the leucine operon of  
1011 *Escherichia coli* K-12. *J Bacteriol*. 1973;113: 1268–1272.
- 1012 49. Wild J, Hennig J, Lobočka M, Walczak W, Kłopotowski T. Identification of the *dadX* gene  
1013 coding for the predominant isozyme of alanine racemase in *Escherichia coli* K12. *Mol Gen  
1014 Genet*. 1985;198: 315–322.
- 1015 50. Lee Y-J, Cho J-Y. Genetic manipulation of a primary metabolic pathway for L-ornithine  
1016 production in *Escherichia coli*. *Biotechnol Lett*. 2006;28: 1849–1856.
- 1017 51. Felton J, Michaelis S, Wright A. Mutations in two unlinked genes are required to produce  
1018 asparagine auxotrophy in *Escherichia coli*. *J Bacteriol*. 1980;142: 221–228.
- 1019 52. Vander Horn PB, Backstrom AD, Stewart V, Begley TP. Structural genes for thiamine  
1020 biosynthetic enzymes (*thiCEFGH*) in *Escherichia coli* K-12. *J Bacteriol*. 1993;175: 982–992.
- 1021 53. Cronan JE Jr, Littel KJ, Jackowski S. Genetic and biochemical analyses of pantothenate  
1022 biosynthesis in *Escherichia coli* and *Salmonella typhimurium*. *J Bacteriol*. 1982;149: 916–  
1023 922.

- 1024 54. Yang Y, Tsui HC, Man TK, Winkler ME. Identification and function of the pdxY gene, which  
1025 encodes a novel pyridoxal kinase involved in the salvage pathway of pyridoxal 5'-  
1026 phosphate biosynthesis in *Escherichia coli* K-12. *J Bacteriol.* 1998;180: 1814–1821.
- 1027 55. Deatherage DE, Barrick JE. Identification of mutations in laboratory-evolved microbes from  
1028 next-generation sequencing data using breseq. *Methods Mol Biol.* 2014;1151: 165–188.
- 1029 56. Ardeshir F, Ames GF. Cloning of the histidine transport genes from *Salmonella typhimurium*  
1030 and characterization of an analogous transport system in *Escherichia coli*. *J Supramol*  
1031 *Struct.* 1980;13: 117–130.
- 1032 57. Yao N, Trakhanov S, Quioco FA. Refined 1.89-Å structure of the histidine-binding protein  
1033 complexed with histidine and its relationship with many other active  
1034 transport/chemosensory proteins. *Biochemistry.* 1994;33: 4769–4779.
- 1035 58. Caldara M, Charlier D, Cunin R. The arginine regulon of *Escherichia coli*: whole-system  
1036 transcriptome analysis discovers new genes and provides an integrated view of arginine  
1037 regulation. *Microbiology.* 2006;152: 3343–3354.
- 1038 59. Seol W, Shatkin AJ. *Escherichia coli* alpha-ketoglutarate permease is a constitutively  
1039 expressed proton symporter. *J Biol Chem.* 1992;267: 6409–6413.
- 1040 60. Seol W, Shatkin AJ. Membrane topology model of *Escherichia coli* alpha-ketoglutarate  
1041 permease by phoA fusion analysis. *J Bacteriol.* 1993;175: 565–567.
- 1042 61. Baker KE, Ditullio KP, Neuhard J, Kelln RA. Utilization of orotate as a pyrimidine source by  
1043 *Salmonella typhimurium* and *Escherichia coli* requires the dicarboxylate transport protein  
1044 encoded by *dctA*. *J Bacteriol.* 1996;178: 7099–7105.
- 1045 62. The UniProt Consortium. UniProt: the universal protein knowledgebase. *Nucleic Acids Res.*

- 1046           2018; doi:10.1093/nar/gky092
- 1047   63. Riley M, Abe T, Arnaud MB, Berlyn MKB, Blattner FR, Chaudhuri RR, et al. Escherichia coli  
1048       K-12: a cooperatively developed annotation snapshot--2005. *Nucleic Acids Res.* 2006;34:  
1049       1–9.
- 1050   64. van Heeswijk WC, Westerhoff HV, Boogerd FC. Nitrogen assimilation in Escherichia coli:  
1051       putting molecular data into a systems perspective. *Microbiol Mol Biol Rev.* 2013;77: 628–  
1052       695.
- 1053   65. Javelle A, Severi E, Thornton J, Merrick M. Ammonium sensing in Escherichia coli. Role of  
1054       the ammonium transporter AmtB and AmtB-GlnK complex formation. *J Biol Chem.*  
1055       2004;279: 8530–8538.
- 1056   66. Finn RD, Coggill P, Eberhardt RY, Eddy SR, Mistry J, Mitchell AL, et al. The Pfam protein  
1057       families database: towards a more sustainable future. *Nucleic Acids Res.* 2016;44: D279–  
1058       85.
- 1059   67. Song Y, Peisach D, Pioszak AA, Xu Z, Ninfa AJ. Crystal structure of the C-terminal domain  
1060       of the two-component system transmitter protein nitrogen regulator II (NRII; NtrB), regulator  
1061       of nitrogen assimilation in Escherichia coli. *Biochemistry.* 2004;43: 6670–6678.
- 1062   68. Brown CJ, Todd KM, Rosenzweig RF. Multiple duplications of yeast hexose transport  
1063       genes in response to selection in a glucose-limited environment. *Mol Biol Evol.* 1998;15:  
1064       931–942.
- 1065   69. Slack A, Thornton PC, Magner DB, Rosenberg SM, Hastings PJ. On the mechanism of  
1066       gene amplification induced under stress in Escherichia coli. *PLoS Genet.* 2006;2: e48.
- 1067   70. Serres MH, Kerr ARW, McCormack TJ, Riley M. Evolution by leaps: gene duplication in

- 1068 bacteria. *Biol Direct*. 2009;4: 46.
- 1069 71. Wallace B, Yang YJ, Hong JS, Lum D. Cloning and sequencing of a gene encoding a  
1070 glutamate and aspartate carrier of *Escherichia coli* K-12. *J Bacteriol*. 1990;172: 3214–3220.
- 1071 72. Carter EL, Jager L, Gardner L, Hall CC, Willis S, Green JM. *Escherichia coli* abg genes  
1072 enable uptake and cleavage of the folate catabolite p-aminobenzoyl-glutamate. *J Bacteriol*.  
1073 2007;189: 3329–3334.
- 1074 73. Bailey SF, Rodrigue N, Kassen R. The effect of selection environment on the probability of  
1075 parallel evolution. *Mol Biol Evol*. 2015;32: 1436–1448.
- 1076 74. Goldford JE, Lu N, Bajic D, Estrela S, Tikhonov M, Sanchez-Gorostiaga A, et al. Emergent  
1077 Simplicity in Microbial Community Assembly [Internet]. 2017. doi:10.1101/205831
- 1078 75. Ebrahim A, Brunk E, Tan J, O'Brien EJ, Kim D, Szubin R, et al. Multi-omic data integration  
1079 enables discovery of hidden biological regularities. *Nat Commun*. 2016;7: 13091.
- 1080 76. Kallus Y, Miller JH, Libby E. Paradoxes in leaky microbial trade. *Nat Commun*. Nature  
1081 Publishing Group; 2017;8: 1361.
- 1082 77. Sheth RU, Cabral V, Chen SP, Wang HH. Manipulating Bacterial Communities by in situ  
1083 Microbiome Engineering. *Trends Genet*. 2016;32: 189–200.
- 1084 78. Mueller UG, Sachs JL. Engineering Microbiomes to Improve Plant and Animal Health.  
1085 *Trends Microbiol*. 2015;23: 606–617.
- 1086 79. Ebrahim A, Lerman JA, Palsson BO, Hyduke DR. COBRAPy: COstraints-Based  
1087 Reconstruction and Analysis for Python. *BMC Syst Biol*. 2013;7: 74.
- 1088 80. Burgard AP, Pharkya P, Maranas CD. Optknock: A bilevel programming framework for

- 1089 identifying gene knockout strategies for microbial strain optimization. *Biotechnol Bioeng.*  
1090 2003;84: 647–657.
- 1091 81. Orth JD, Palsson B. Gap-filling analysis of the iJO1366 *Escherichia coli* metabolic network  
1092 reconstruction for discovery of metabolic functions. *BMC Syst Biol.* 2012;6: 30.
- 1093 82. Chen S, Huang T, Zhou Y, Han Y, Xu M, Gu J. AfterQC: automatic filtering, trimming, error  
1094 removing and quality control for fastq data. *BMC Bioinformatics.* 2017;18: 80.
- 1095 83. Grenier F, Matteau D, Baby V, Rodrigue S. Complete Genome Sequence of *Escherichia*  
1096 *coli* BW25113. *Genome Announc.* 2014;2. doi:10.1128/genomeA.01038-14
- 1097 84. Langmead B, Salzberg SL. Fast gapped-read alignment with Bowtie 2. *Nat Methods.*  
1098 2012;9: 357–359.
- 1099 85. Li H, Handsaker B, Wysoker A, Fennell T, Ruan J, Homer N, et al. The Sequence  
1100 Alignment/Map format and SAMtools. *Bioinformatics.* 2009;25: 2078–2079.
- 1101 86. Seabold S, Perktold J. Statsmodels: Econometric and statistical modeling with python.  
1102 Proceedings of the 9th Python in Science Conference. SciPy society Austin; 2010. p. 61.
- 1103 87. Yang L, Ma D, Ebrahim A, Lloyd CJ, Saunders MA, Palsson BO. solveME: fast and reliable  
1104 solution of nonlinear ME models. *BMC Bioinformatics.* [bmcbioinformatics.biomedcentral.](http://bmcbioinformatics.biomedcentral.com)  
1105 ...; 2016;17: 391.
- 1106 88. Ma D, Yang L, Fleming RMT, Thiele I, Palsson BO, Saunders MA. Reliable and efficient  
1107 solution of genome-scale models of Metabolism and macromolecular Expression. *Sci Rep.*  
1108 2017;7: 40863.
- 1109
- 1110

1111

1112

1113

1114

1115

1116

1117
